# Supplementary material for: Multicomponent supramolecular hydrogels composed of cationic phenylalanine derivatives and anionic amino acids
Source: Royal Society of Chemistry journal article supplement (doi:10.1039/d4fd00198b), 2024-12-30
Supplement: d4fd00198b1.xlsx [file d4fd00198b1.xlsx]

## Sheet: Fig 4A
Fmoc 3FPhe DAP NaCl
Storage modulus	Loss modulus	Tan(delta)	Angular frequency	Oscillation torque	Step time	Temperature	Raw phase	Oscillation displacement	Complex viscosity	Axial force	Gap	Oscillation strain	Oscillation strain rate	Complex modulus			G'		G"
Pa	Pa		rad/s	µN.m	s	°C	°	rad	Pa.s	N	µm	%	1/s	Pa			7297.35		1428.48
10938.5	1933.14	0.176727	100	17.7748	6.17761	25	160.059	0.000199716	111.08	0.173716	1000.03	0.199675	0.199675	11108			8021.48		1511.41
10428.9	2035.87	0.195215	63.0957	13.9384	12.8388	25	27.2431	0.000199593	168.406	0.173516	1000.03	0.199554	0.12591	10625.7			7566.17		1511.41
9797.57	2032.83	0.207483	39.8105	23.8476	19.3908	25	15.7231	0.000202455	251.347	0.172618	1000.04	0.202415	0.0805825	10006.2			7330		1301.66
9192.48	1975.01	0.21485	25.1188	26.8364	26.0052	25	13.5939	0.000203385	374.312	0.173193	1000.03	0.203348	0.0510786	9402.25			6856.71		1108.53
8612.15	1859.32	0.215895	15.849	27.0123	32.7133	25	12.7684	0.000204472	555.906	0.1731	1000.03	0.204438	0.0324014	8810.57			7414.34		1372.3
8138.11	1748.15	0.214811	10.0001	26.0673	39.4681	25	12.3616	0.000203289	832.37	0.172438	1000.06	0.20325	0.0203251	8323.76			425.27		170.606
7614.45	1632.87	0.214444	6.30957	24.8734	46.1293	25	12.2026	0.000205036	1234.25	0.172645	1000.04	0.205002	0.0129348	7787.56
7143.26	1509.98	0.211385	3.98105	23.4513	52.8217	25	11.9763	0.000205224	1833.97	0.172146	1000.04	0.205192	0.0081688	7301.11
6639.78	1446.61	0.21787	2.51189	22.0776	59.0305	25	12.3081	0.000207164	2705.35	0.171223	1000.04	0.207133	0.00520296	6795.54
6265.36	1356.22	0.216464	1.5849	20.6758	66.7057	25	12.2205	0.000205487	4044.72	0.171518	1000.04	0.205458	0.0032563	6410.46
5969.05	1112.6	0.186394	1	19.5045	76.6429	25	10.5602	0.000204582	6071.85	0.170689	1000.04	0.204554	0.00204554	6071.85
5649.67	1051.52	0.186121	0.630957	18.4575	90.215	25	10.5435	0.000204518	9107.89	0.171493	1000.02	0.204495	0.00129028	5746.69
5411.65	923.214	0.170597	0.398107	17.503	109.559	24.99	9.6809	0.000203004	13789.9	0.171308	1000.03	0.20298	0.000808078	5489.84
5148.49	812.271	0.157769	0.251189	16.7231	138.294	25.01	8.965	0.000204285	20750	0.171527	1000.03	0.204261	0.000513081	5212.17
4921.94	841.367	0.170942	0.15849	16.0558	181.569	25.01	9.6998	0.000204726	31505.8	0.170349	1000.03	0.204703	0.000324433	4993.33
4886.29	584.656	0.119652	0.1	15.5123	248.103	25	6.82262	0.000200696	49211.4	0.168185	1000.03	0.200674	0.000200674	4921.14
Storage modulus	Loss modulus	Tan(delta)	Angular frequency	Oscillation torque	Step time	Temperature	Raw phase	Oscillation displacement	Complex viscosity	Axial force	Gap	Oscillation strain	Oscillation strain rate	Complex modulus
Pa	Pa		rad/s	µN.m	s	°C	°	rad	Pa.s	N	µm	%	1/s	Pa
12570.1	2108.02	0.167701	100	13.3436	6.11521	25	150.307	0.000199702	127.456	0.183172	1000.02	0.199657	0.199657	12745.6
11599.9	2190.03	0.188797	63.0957	17.7383	12.636	25	23.1368	0.000202687	187.093	0.183359	1000.02	0.202645	0.12786	11804.8
10759.4	2182.44	0.20284	39.8105	27.1015	19.2036	24.99	14.9337	0.000203814	275.769	0.182557	1000.08	0.203762	0.0811187	10978.5
10006.6	2109.78	0.210839	25.1188	29.625	25.74	25	13.2188	0.000204485	407.128	0.181241	1000.02	0.204448	0.0513548	10226.6
9376.72	1977.58	0.210903	15.849	29.5007	32.3857	25	12.4335	0.000204538	604.642	0.181168	1000.02	0.204503	0.0324117	9582.99
8783.18	1906.45	0.217057	10.0001	28.3836	39.2653	24.99	12.4686	0.000204701	898.764	0.180801	1000.03	0.204666	0.0204667	8987.7
8291.62	1751.92	0.211288	6.30957	26.974	45.8953	25.01	12.02	0.000204187	1343.15	0.180588	1000.02	0.204155	0.0128813	8474.67
7805.43	1687.2	0.216157	3.98105	25.5324	52.6033	24.99	12.2348	0.00020422	2005.93	0.181502	1000.03	0.204189	0.00812885	7985.7
7331.29	1477.44	0.201525	2.51189	24.0999	58.7965	25	11.4081	0.000205454	2977.31	0.180347	1000.02	0.205426	0.00516007	7478.68
6904.63	1353.22	0.195987	1.5849	22.6868	66.4405	25	11.0938	0.000205418	4439.4	0.180033	1000.03	0.205388	0.00325519	7035.98
6450.35	1237.04	0.191778	1	21.3904	76.1905	25	10.8578	0.000207411	6567.9	0.180088	1000.02	0.207385	0.00207385	6567.9
6165.33	1060.77	0.172054	0.630957	20.1354	89.9654	24.99	9.7624	0.000204949	9914.97	0.178705	1000.02	0.204924	0.00129298	6255.92
5892.01	1077.17	0.182818	0.398107	19.2029	109.247	25	10.3598	0.000204135	15045.4	0.178767	1000.03	0.204109	0.000812573	5989.67
5654.39	696.567	0.12319	0.251189	18.3893	137.67	25	7.02238	0.000205518	22680.7	0.177917	1000.03	0.205493	0.000516174	5697.14
5404.96	708.609	0.131103	0.15849	17.61	181.007	25	7.46847	0.000205684	34394.8	0.180257	1000.03	0.20566	0.000325949	5451.22
5347.78	658.383	0.123113	0.1	17.0753	247.37	25	7.01797	0.000201772	53881.5	0.181298	1000.03	0.201748	0.000201748	5388.15
Storage modulus	Loss modulus	Tan(delta)	Angular frequency	Oscillation torque	Step time	Temperature	Raw phase	Oscillation displacement	Complex viscosity	Axial force	Gap	Oscillation strain	Oscillation strain rate	Complex modulus
Pa	Pa		rad/s	µN.m	s	°C	°	rad	Pa.s	N	µm	%	1/s	Pa
11983.3	1987.95	0.165893	100	14.8219	6.13081	25	155.102	0.000199906	121.471	0.173274	999.999	0.199867	0.199867	12147.1
10952.3	2075.88	0.189538	63.0957	15.7539	12.6672	25	24.8736	0.000203294	176.672	0.172163	1000.04	0.20325	0.128242	11147.3
10117.5	2064.74	0.204076	39.8105	25.0435	19.2504	25.01	15.3127	0.000203994	259.379	0.1719	1000.04	0.203952	0.0811945	10326
9403.63	2000.49	0.212735	25.1188	27.6494	25.7868	25	13.4285	0.000204409	382.744	0.171152	1000.04	0.20437	0.0513353	9614.06
8788.52	1880.82	0.214008	15.849	27.6039	32.4793	24.99	12.6482	0.000204652	567.071	0.171267	1000.04	0.204615	0.0324295	8987.52
8227.04	1733.5	0.210707	10.0001	26.5945	39.3121	25	12.1299	0.000205281	840.763	0.170912	999.999	0.205254	0.0205255	8407.69
7724.4	1626.23	0.210532	6.30957	25.251	45.9421	25	11.9851	0.000205328	1251.07	0.171161	1000.04	0.205294	0.0129532	7893.73
7375.71	1591.92	0.215833	3.98105	23.8433	52.6501	24.99	12.2195	0.000201873	1895.37	0.172122	1000.04	0.20184	0.00803537	7545.55
7027.44	1401.76	0.19947	2.51189	22.6254	58.8745	25	11.2955	0.000201319	2852.78	0.171127	1000.04	0.201288	0.00505613	7165.88
6299.61	1353.57	0.214866	1.5849	21.4507	66.6277	25	12.1329	0.000212099	4065.5	0.170162	1000.04	0.212069	0.00336107	6443.39
6067.16	1285.5	0.211879	1	19.759	76.5337	25	11.9648	0.000202906	6201.85	0.16952	1000.04	0.202878	0.00202878	6201.85
5907.98	899.432	0.15224	0.630957	18.8332	90.2618	25	8.65636	0.000200676	9471.4	0.167371	1000.04	0.200649	0.00126601	5976.05
5509.21	843.338	0.153078	0.398107	18.1275	109.668	25	8.70276	0.000207097	13999.7	0.169243	1000.04	0.207071	0.000824363	5573.39
5391.87	759.684	0.140894	0.251189	17.1391	138.294	25.01	8.01931	0.000200404	21677.4	0.168027	999.998	0.200387	0.000503348	5445.12
5220.9	648.028	0.124122	0.15849	16.7167	181.6	25	7.07492	0.000202306	33194.4	0.167238	1000.01	0.202287	0.000320604	5260.97
5062.08	678.869	0.134109	0.1	16.2543	248.181	25	7.63768	0.000202634	51074	0.166431	1000.06	0.202605	0.000202605	5107.4
Storage modulus	Loss modulus	Tan(delta)	Angular frequency	Oscillation torque	Step time	Temperature	Raw phase	Oscillation displacement	Complex viscosity	Axial force	Gap	Oscillation strain	Oscillation strain rate	Complex modulus
Pa	Pa		rad/s	µN.m	s	°C	°	rad	Pa.s	N	µm	%	1/s	Pa
11601.6	1780.05	0.153432	100	15.6574	6.14641	24.99	159.116	0.000199702	117.374	0.152825	1000.03	0.199659	0.199659	11737.4
10484.9	1864.89	0.177865	63.0957	14.1868	12.6672	25.01	24.9404	0.000204288	168.782	0.152554	1000.02	0.20425	0.128873	10649.5
9647.22	1865.94	0.193418	39.8105	23.4809	19.2036	25	14.7836	0.000204488	246.82	0.153297	1000.02	0.204452	0.0813935	9826.01
8968.03	1790.65	0.19967	25.1188	26.1674	25.7556	25	12.7043	0.000204667	364.072	0.153171	1000.06	0.204625	0.0513993	9145.05
8385.54	1703.92	0.203197	15.849	26.2461	32.4637	25	12.0558	0.000204874	539.901	0.152754	1000.02	0.204842	0.0324654	8556.91
7909.95	1574.25	0.199022	10.0001	25.3891	39.2809	25	11.4846	0.000204482	806.503	0.153739	1000.02	0.204452	0.0204453	8065.09
7485.06	1450.2	0.193745	6.30957	24.2413	45.9733	25	11.0569	0.000204143	1208.36	0.153157	1000.02	0.204115	0.0128788	7624.26
7159.56	1326.31	0.18525	3.98105	23.0548	52.6189	25	10.5309	0.000202303	1829.01	0.153921	1000.02	0.202275	0.00805267	7281.38
6668.21	1298.82	0.194778	2.51189	21.9536	58.7965	25.01	11.0373	0.000206065	2704.55	0.152627	1000.05	0.206032	0.0051753	6793.53
6319.33	1265.26	0.200221	1.5849	20.6433	66.6277	24.99	11.328	0.000204077	4066.36	0.153399	1000.06	0.204044	0.00323388	6444.75
5939.73	983.535	0.165586	1	19.5917	76.4557	24.99	9.40367	0.000207242	6020.61	0.152417	1000.02	0.207218	0.00207218	6020.61
5723.75	1001.7	0.175008	0.630957	18.492	89.981	25	9.92689	0.000202642	9209.4	0.151329	1000.02	0.202619	0.00127844	5810.74
5531.56	824.029	0.148968	0.398107	17.7219	109.325	25.01	8.47258	0.000201772	14048	0.150246	1000.06	0.201742	0.000803149	5592.61
5290.13	717.807	0.135688	0.251189	17.0657	137.998	25.01	7.72664	0.000203531	21253.4	0.149247	1000.02	0.203509	0.000511192	5338.61
5140.22	747.763	0.145473	0.15849	16.468	181.304	25	8.27629	0.000201857	32773.9	0.147623	1000.03	0.201834	0.000319887	5194.33
5025.2	631.479	0.125662	0.1	16.043	247.791	25	7.16182	0.000201671	50647.2	0.147281	999.994	0.201656	0.000201656	5064.72
Storage modulus	Loss modulus	Tan(delta)	Angular frequency	Oscillation torque	Step time	Temperature	Raw phase	Oscillation displacement	Complex viscosity	Axial force	Gap	Oscillation strain	Oscillation strain rate	Complex modulus
Pa	Pa		rad/s	µN.m	s	°C	°	rad	Pa.s	N	µm	%	1/s	Pa
10303.9	1516.69	0.147196	100	19.3802	5.99041	25	165.779	0.000199906	104.149	0.0899244	999.988	0.199875	0.199875	10414.9
9522.13	1573.46	0.165243	63.0957	10.8933	12.5112	25	27.3769	0.000202732	152.962	0.0900803	999.993	0.202702	0.127896	9651.26
8891.31	1578.82	0.177568	39.8105	20.7792	19.0476	25	14.0455	0.000203403	226.834	0.0886301	999.997	0.203374	0.0809644	9030.39
8346.11	1574.65	0.188669	25.1188	23.9642	25.6152	25	12.1411	0.000203824	338.127	0.0891382	1000	0.203796	0.0511912	8493.35
7856.1	1499.41	0.190859	15.849	24.3553	32.2765	24.99	11.3825	0.000204138	504.631	0.0882716	1000.01	0.20411	0.0323495	7997.9
7423.46	1389.49	0.187176	10.0001	23.6983	39.1093	25	10.8326	0.000204113	755.233	0.0878592	1000.01	0.204087	0.0204088	7552.38
7016.27	1393.08	0.198551	6.30957	22.6833	45.7237	24.99	11.3308	0.000203714	1133.71	0.0888314	1000.02	0.203686	0.0128517	7153.23
6624.73	1212.31	0.182998	3.98105	21.5903	52.4473	25	10.4088	0.000204889	1691.7	0.0888857	1000.03	0.204861	0.00815561	6734.74
6216.01	1095.74	0.176278	2.51189	20.4184	58.6405	25	10.0125	0.000206302	2512.79	0.0884887	1000.04	0.206273	0.00518135	6311.85
5995.68	1038.47	0.173202	1.5849	19.2904	66.4873	24.99	9.83189	0.000201979	3839.34	0.0882637	1000.03	0.201954	0.00320076	6084.95
5764.27	847.643	0.147051	1	18.4731	76.3465	25	8.36701	0.000201931	5826.26	0.087777	1000.03	0.201906	0.00201906	5826.26
5473.12	784.123	0.143268	0.630957	17.6927	89.9966	25.01	8.1534	0.000203763	8762.88	0.0881517	1000.02	0.203741	0.00128552	5529.01
5267.79	686.898	0.130396	0.398107	16.9588	109.465	25	7.42894	0.000203266	13344.1	0.0880547	1000.05	0.203239	0.000809108	5312.39
5075.93	568.73	0.112045	0.251189	16.3809	138.154	25.01	6.39262	0.000204202	20334.1	0.0875561	1000.05	0.204175	0.000512864	5107.69
4937.91	540.291	0.109417	0.15849	15.9035	181.506	25	6.24383	0.000203837	31342	0.0872124	1000	0.203821	0.000323035	4967.38
4992.69	436.66	0.0874598	0.1	15.5764	248.15	24.99	4.99797	0.000197875	50117.5	0.0836794	999.994	0.197861	0.000197861	5011.75

## Sheet: Fig S10
Fmoc3FPheDAP MSG 3 equiv
Storage modulus	Loss modulus	Tan(delta)	Angular frequency	Oscillation torque	Step time	Temperature	Raw phase	Oscillation displacement	Complex viscosity	Axial force	Gap	Oscillation strain	Oscillation strain rate	Complex modulus
Pa	Pa		rad/s	µN.m	s	°C	°	rad	Pa.s	N	µm	%	1/s	Pa			G'		G"
100.204	48.9456	0.488459	100	50.8141	6.11521	25.01	179.826	0.000200226	1.11519	-0.0261546	999.996	0.200226	0.200226	111.519			14.551		5.25425
61.7144	27.2031	0.44079	63.0957	20.0004	12.7608	24.99	179.757	0.000198632	1.06891	-0.025395	1000.05	0.198622	0.125322	67.4439			26.286		9.30209
47.7518	22.1671	0.464216	39.8105	7.88892	19.344	25	179.498	0.000198602	1.32242	-0.0247274	1000.04	0.198594	0.0790611	52.6461			23.7607		10.0148
37.1004	15.6496	0.421817	25.1188	3.09595	25.8492	25.01	179.093	0.00019934	1.60302	-0.0248365	1000.03	0.199334	0.0500703	40.266			22.7367		8.34056
28.7476	12.5819	0.437669	15.849	1.19466	32.5729	25	178.102	0.000200243	1.97996	-0.0246392	1000.02	0.200239	0.0317359	31.3804			19.5779		5.39721
22.9186	10.7234	0.467891	10.0001	0.442408	39.3745	25	175.609	0.000201089	2.53031	-0.0251611	1000.02	0.201085	0.0201086	25.3033		Average	21.3825		7.66179
19.6135	8.45363	0.43101	6.30957	0.145138	46.0201	25	169.385	0.000201342	3.38498	-0.0248352	1000.04	0.201334	0.0127033	21.3578		Stdev	4.51275		2.21431
17.645	7.22663	0.409557	3.98105	0.0342264	52.7593	24.99	138.332	0.000200454	4.78957	-0.0244805	1000.02	0.20045	0.00798003	19.0675
15.9525	6.39494	0.400874	2.51189	0.0269196	58.9213	24.99	48.314	0.00020014	6.84207	-0.0249555	1000.04	0.200132	0.00502711	17.1865
14.3607	5.12129	0.356617	1.5849	0.0361278	66.3469	25	26.488	0.000200311	9.61992	-0.0248226	1000.04	0.200303	0.00317459	15.2466
13.3922	4.49527	0.335664	1	0.0395655	76.3309	25	20.9088	0.000199974	14.1265	-0.0246389	1000.02	0.19997	0.0019997	14.1265
12.5941	3.86554	0.306934	0.630957	0.039484	90.0902	24.99	17.9296	0.000200193	20.8793	-0.0238873	1000.05	0.200183	0.00126307	13.1739
11.8893	3.35433	0.28213	0.398107	0.0381906	109.434	25	16.0865	0.000200843	31.0304	-0.0252501	1000.02	0.200839	0.000799554	12.3534
11.0192	3.02596	0.274608	0.251189	0.0356514	138.076	25	15.4928	0.000200358	45.4922	-0.0254862	1000.03	0.200352	0.000503262	11.4271
10.4625	2.62594	0.250987	0.15849	0.0336693	181.272	25	14.1425	0.00019945	68.061	-0.0263125	1000.05	0.19944	0.000316092	10.787
10.2138	2.50986	0.245731	0.1	0.0331911	247.791	25	13.827	0.000201202	105.177	-0.0275124	1000	0.201202	0.000201202	10.5177
Storage modulus	Loss modulus	Tan(delta)	Angular frequency	Oscillation torque	Step time	Temperature	Raw phase	Oscillation displacement	Complex viscosity	Axial force	Gap	Oscillation strain	Oscillation strain rate	Complex modulus
Pa	Pa		rad/s	µN.m	s	°C	°	rad	Pa.s	N	µm	%	1/s	Pa
-508.768	56.3234	-0.110705	100	52.7711	5.97481	24.99	179.808	0.000200384	5.11876	-0.0276635	1000.03	0.20038	0.20038	511.877
-165.449	39.5036	-0.238765	63.0957	22.3972	12.6672	25	179.659	0.000214821	2.6959	-0.0272732	1000.03	0.214815	0.135539	170.1
-31.3994	28.8869	-0.919981	39.8105	8.7571	19.2036	25.01	179.365	0.000213762	1.07172	-0.0273113	1000.05	0.213752	0.0850956	42.6659
16.6989	23.437	1.40351	25.1188	3.19169	25.7244	24.99	178.669	0.00020132	1.14566	-0.0273913	1000.04	0.201312	0.0505672	28.7776
30.6365	19.1661	0.625598	15.849	1.16837	32.4481	24.99	177.095	0.000196671	2.28012	-0.0282596	1000.02	0.196667	0.0311697	36.1377
33.4136	15.777	0.472173	10.0001	0.405273	39.1873	25	173.036	0.00019829	3.69508	-0.0288073	1000.04	0.198282	0.0198283	36.951
33.0719	13.2257	0.399908	6.30957	0.107399	45.8797	25	157.318	0.000199345	5.64514	-0.027902	999.983	0.199349	0.012578	35.6184
31.4539	11.9596	0.380226	3.98105	0.041562	52.5565	25	64.561	0.000199792	8.45275	-0.0272513	1000.02	0.199788	0.00795367	33.6508
28.6441	10.1799	0.355393	2.51189	0.0665899	58.7185	25	28.971	0.000201704	12.1021	-0.0283273	999.99	0.201706	0.00506664	30.3992
27.2082	9.03411	0.332036	1.5849	0.0772691	66.1441	25	21.339	0.000198135	18.0888	-0.0285685	999.992	0.198137	0.00314026	28.6688
26.0338	7.99291	0.307021	1	0.0798842	76.0813	25	18.1321	0.000198018	27.2331	-0.0292746	1000.04	0.19801	0.0019801	27.2331
22.7189	6.44011	0.283469	0.630957	0.0724743	89.6222	25	16.2662	0.000200672	37.4257	-0.0285973	1000	0.200672	0.00126615	23.614
20.7875	7.01991	0.337699	0.398107	0.0675613	108.935	25.01	18.8774	0.000198238	55.1128	-0.0287963	1000.01	0.198236	0.00078919	21.9408
21.1591	7.90448	0.373574	0.251189	0.0704601	137.608	25	20.5758	0.000199441	89.9218	-0.0288347	1000.01	0.199439	0.000500967	22.5873
22.0216	6.64221	0.301623	0.15849	0.0729424	180.945	25.01	16.8139	0.000202235	145.13	-0.0277432	1000.03	0.202229	0.000320511	23.0015
22.6334	6.14705	0.271593	0.1	0.0734304	247.572	25	15.205	0.000199462	234.532	-0.0261953	1000.04	0.199454	0.000199455	23.4532
Storage modulus	Loss modulus	Tan(delta)	Angular frequency	Oscillation torque	Step time	Temperature	Raw phase	Oscillation displacement	Complex viscosity	Axial force	Gap	Oscillation strain	Oscillation strain rate	Complex modulus
Pa	Pa		rad/s	µN.m	s	°C	°	rad	Pa.s	N	µm	%	1/s	Pa
-787.455	60.8845	-0.0773181	100	53.6347	5.99041	25	179.795	0.000200333	7.89805	-0.0254004	1000.04	0.200328	0.200328	789.806
-273.491	37.5712	-0.137376	63.0957	23.5124	12.4332	25	179.681	0.000221905	4.37525	-0.0258724	1000.02	0.221902	0.140011	276.06
-75.0211	28.887	-0.385052	39.8105	9.17063	18.9696	24.99	179.376	0.000220174	2.01933	-0.0267489	1000.03	0.220168	0.0876499	80.3904
-2.50652	23.407	-9.33847	25.1188	3.28569	25.5216	25	178.696	0.000203381	0.93718	-0.0269656	1000.03	0.203375	0.0510852	23.5408
23.9113	17.6467	0.738003	15.849	1.1806	32.2453	25	177.372	0.000195298	1.87507	-0.0264164	1000.03	0.195292	0.0309519	29.718
30.642	16.2287	0.529623	10.0001	0.411469	39.0469	25	172.987	0.000197072	3.46741	-0.0266235	1000.03	0.197066	0.0197068	34.6743
31.1654	13.6677	0.438553	6.30957	0.113391	45.6769	25	157.838	0.000199243	5.3935	-0.02678	1000.03	0.199237	0.012571	34.0307
30.0357	12.3662	0.411718	3.98105	0.0410121	52.4161	25	70.9511	0.000199581	8.1591	-0.0260733	1000.05	0.199571	0.00794502	32.4818
27.321	10.7957	0.395142	2.51189	0.0638209	58.5313	25	32.3206	0.000201225	11.695	-0.0263319	1000.03	0.201219	0.00505439	29.3766
24.535	10.5776	0.431121	1.5849	0.0727002	65.9413	25	27.3482	0.000201016	16.8579	-0.0264708	1000.03	0.20101	0.0031858	26.718
23.0672	9.07403	0.393374	1	0.0728345	75.9253	25	22.938	0.000199159	24.7878	-0.0266365	1000.03	0.199153	0.00199153	24.7878
20.948	7.88674	0.376492	0.630957	0.0686982	89.4506	25	21.2309	0.00020082	35.4753	-0.026546	1000.04	0.200812	0.00126704	22.3834
20.0332	7.33441	0.366113	0.398107	0.0652934	108.857	25	20.3489	0.000197082	53.5876	-0.0263005	1000.03	0.197077	0.000784575	21.3336
18.11	7.82373	0.432011	0.251189	0.0619745	137.592	25	23.4836	0.000200959	78.5375	-0.0273751	1000.03	0.200952	0.00050477	19.7277
17.8408	7.19854	0.403488	0.15849	0.0605043	180.898	25	22.0191	0.000200615	121.385	-0.0270091	1000.02	0.200611	0.000317948	19.2383
17.6692	7.20979	0.408044	0.1	0.0595282	247.448	25	22.2161	0.000198747	190.835	-0.0266726	1000.03	0.198741	0.000198741	19.0835
Storage modulus	Loss modulus	Tan(delta)	Angular frequency	Oscillation torque	Step time	Temperature	Raw phase	Oscillation displacement	Complex viscosity	Axial force	Gap	Oscillation strain	Oscillation strain rate	Complex modulus
Pa	Pa		rad/s	µN.m	s	°C	°	rad	Pa.s	N	µm	%	1/s	Pa
315.249	53.4995	0.169706	100	50.1444	6.19321	24.99	179.808	0.000200252	3.19756	-0.0256796	1000.03	0.200245	0.200245	319.756
164.155	37.1659	0.226407	63.0957	19.1943	12.8232	25.01	179.662	0.00019372	2.66753	-0.0240751	1000.02	0.193716	0.122227	168.31
95.1865	24.5922	0.258359	39.8105	7.52621	19.344	25	179.432	0.00019309	2.4695	-0.0243251	1000.03	0.193084	0.0768679	98.312
61.6316	21.1087	0.342498	25.1188	2.99681	25.8648	24.99	178.746	0.000197843	2.59353	-0.0244388	1000.05	0.197833	0.0496933	65.1463
46.5442	18.0741	0.388322	15.849	1.14708	32.7133	25	177.14	0.000201584	3.15037	-0.0246411	1000.03	0.201578	0.0319481	49.9303
35.7588	16.0683	0.449353	10.0001	0.405154	39.4057	25.01	172.779	0.000201784	3.92028	-0.0246713	1000.05	0.201774	0.0201776	39.2031
30.7874	12.2883	0.399133	6.30957	0.113934	45.9889	25	160.093	0.000200988	5.25379	-0.0241733	1000.02	0.200984	0.0126812	33.1492
27.5692	10.7365	0.389439	3.98105	0.034242	52.6969	25	80.4611	0.000200234	7.43173	-0.0249426	1000.02	0.200229	0.00797124	29.5861
23.8671	9.34581	0.391578	2.51189	0.0521194	58.8589	25.01	34.4775	0.000200979	10.2041	-0.0243798	1000.02	0.200975	0.00504828	25.6317
23.212	8.13362	0.350405	1.5849	0.06517	66.3469	25.01	23.0356	0.000199603	15.5189	-0.0237533	1000.02	0.199599	0.00316344	24.5958
21.1945	7.70846	0.363701	1	0.066183	76.2373	25	21.5003	0.000200333	22.5528	-0.0240446	1000.03	0.200327	0.00200327	22.5528
19.541	6.42878	0.32899	0.630957	0.0628789	89.8094	25	18.7914	0.000200588	32.6033	-0.0236014	1000.06	0.200576	0.00126555	20.5713
18.0815	5.71799	0.316234	0.398107	0.0591487	109.138	25	17.7865	0.000201163	47.6356	-0.0238716	999.991	0.201165	0.000800852	18.9641
17.5133	5.29095	0.302111	0.251189	0.0567623	137.826	25	16.9036	0.000198584	72.8339	-0.0242694	1000	0.198584	0.000498819	18.295
16.4523	5.10118	0.31006	0.15849	0.0540847	180.945	24.99	17.2669	0.000200348	108.682	-0.0249151	1000.01	0.200346	0.000317528	17.225
16.1267	4.92629	0.305473	0.1	0.0529356	247.432	25	17.0027	0.000200045	168.624	-0.0244644	1000.04	0.200037	0.000200037	16.8624
Storage modulus	Loss modulus	Tan(delta)	Angular frequency	Oscillation torque	Step time	Temperature	Raw phase	Oscillation displacement	Complex viscosity	Axial force	Gap	Oscillation strain	Oscillation strain rate	Complex modulus
Pa	Pa		rad/s	µN.m	s	°C	°	rad	Pa.s	N	µm	%	1/s	Pa
-771.13	39.2797	-0.0509379	100	53.5822	6.13081	25	179.868	0.00020033	7.72129	-0.0245175	1000.01	0.20033	0.20033	772.13
-279.202	27.2644	-0.0976513	63.0957	23.4327	12.7452	25	179.769	0.000220968	4.44609	-0.0249099	1000.02	0.220964	0.139419	280.53
-82.5932	19.8804	-0.240702	39.8105	9.19332	19.344	25	179.572	0.000220097	2.13391	-0.024676	1000.02	0.220093	0.0876202	84.9521
-12.9016	14.2303	-1.10298	25.1188	3.33377	25.8336	25	179.215	0.000204325	0.764692	-0.0250035	1000	0.204325	0.051324	19.2081
15.0091	11.4977	0.766046	15.849	1.2084	32.6665	25.01	178.326	0.000195495	1.19294	-0.0247904	1000.02	0.195492	0.0309835	18.9069
21.0664	10.0301	0.476118	10.0001	0.440086	39.3433	25	175.945	0.000197501	2.33321	-0.0255231	1000.01	0.197499	0.0197501	23.3323
23.0274	7.87244	0.341873	6.30957	0.132382	45.9889	25	169.307	0.000198634	3.85698	-0.024856	1000.03	0.198628	0.0125326	24.3359
23.3744	7.47145	0.319642	3.98105	0.0246436	52.6969	25	107.745	0.000199996	6.16407	-0.0247317	1000.03	0.19999	0.00796172	24.5395
22.7008	6.74338	0.297055	2.51189	0.0442597	58.8745	25.01	28.4545	0.000199091	9.42764	-0.0252059	1000.03	0.199085	0.0050008	23.6812
21.6142	6.68435	0.309258	1.5849	0.0590467	66.5185	25	20.8717	0.000200363	14.2748	-0.0243021	1000.03	0.200357	0.00317544	22.6242
19.7104	4.47964	0.227273	1	0.0598545	76.4401	25.01	13.9123	0.000204524	20.213	-0.0251988	1000.02	0.20452	0.0020452	20.213
19.0809	5.25628	0.275474	0.630957	0.0601748	90.0122	25	15.9153	0.000199858	31.3676	-0.0244173	1000.03	0.199852	0.00126098	19.7916
18.6846	3.84032	0.205534	0.398107	0.0598292	109.341	25	11.7724	0.000202352	47.9146	-0.0250769	1000	0.202352	0.000805579	19.0751
18.4125	2.15887	0.11725	0.251189	0.0573911	138.091	24.99	6.72453	0.000198179	73.8035	-0.0246722	1000.04	0.198171	0.000497784	18.5386
16.6167	2.2785	0.137121	0.15849	0.052632	181.335	24.99	7.82677	0.000200264	105.825	-0.0228395	1000.03	0.200258	0.000317387	16.7722
15.6371	2.554	0.16333	0.1	0.0498146	247.76	25	9.28568	0.000200361	158.443	-0.0224481	1000.02	0.200356	0.000200357	15.8443

## Sheet: Fig 4B
Fmoc 3FPhe DAP MSG 5 equiv
Storage modulus	Loss modulus	Tan(delta)	Angular frequency	Oscillation torque	Step time	Temperature	Raw phase	Oscillation displacement	Complex viscosity	Axial force	Gap	Oscillation strain	Oscillation strain rate	Complex modulus			G'		G"
Pa	Pa		rad/s	µN.m	s	°C	°	rad	Pa.s	N	µm	%	1/s	Pa			136.022		17.7202
119.062	57.5886	0.483687	100	50.8436	5.97481	25	179.796	0.000200338	1.32258	0.00821126	1000.03	0.200332	0.200332	132.258			244.397		32.225
155.266	37.8957	0.244069	63.0957	20.0417	12.6984	25	179.657	0.000201745	2.53304	0.00799676	1000.04	0.201736	0.127287	159.824			220.775		27.6521
167.165	30.9838	0.185348	39.8105	7.61879	19.3128	25	179.264	0.000201046	4.27055	0.00705545	1000.01	0.201043	0.0800363	170.013			209.507		24.2055
162.108	21.5774	0.133104	25.1188	2.71062	25.8024	25	178.571	0.000199476	6.51059	0.00684683	1000.03	0.19947	0.0501043	163.538			234.081		28.017
159.086	21.6125	0.135854	15.849	0.781986	32.6509	24.99	175.054	0.00019859	10.1298	0.00745306	1000.02	0.198586	0.0314739	160.548		Average	208.956		25.964
153.645	19.8085	0.128924	10.0001	0.0683393	39.3121	25	114.722	0.000199512	15.4916	0.00715265	1000.04	0.199504	0.0199505	154.917		stdev	42.8564		5.41564
149.065	19.6838	0.132048	6.30957	0.272917	45.9265	25	13.1476	0.000200781	23.8303	0.00682226	1000.03	0.200775	0.012668	150.359
144.693	19.5982	0.135447	3.98105	0.381193	52.6189	25	9.36008	0.000201394	36.6772	0.00710622	1000.03	0.201388	0.00801736	146.014
143.865	20.3297	0.141311	2.51189	0.419637	58.7809	25	8.65254	0.000197702	57.8424	0.00797784	1000.04	0.197694	0.00496585	145.294
134.704	16.6453	0.123569	1.5849	0.42241	66.4561	25	7.26245	0.00020423	85.639	0.00754897	1000	0.20423	0.00323683	135.729
133.116	13.8635	0.104146	1	0.415599	76.3777	25	6.01876	0.000200118	133.835	0.00753028	1000.04	0.20011	0.0020011	133.836
131.766	13.7715	0.104515	0.630957	0.409482	89.903	25	5.99586	0.000197736	209.972	0.0078455	1000.03	0.197729	0.00124759	132.483
124.461	13.9642	0.112198	0.398107	0.398927	109.231	25	6.41485	0.000203196	314.593	0.00657698	1000	0.203196	0.000808937	125.242
119.329	16.4981	0.138257	0.251189	0.384983	137.935	25.01	7.87834	0.000203633	479.577	0.00868903	1000.04	0.203624	0.000511481	120.464
119.18	17.8494	0.149768	0.15849	0.377063	181.148	25	8.52064	0.000199269	760.363	0.00891645	1000.05	0.199259	0.000315805	120.51
119.353	19.0181	0.159344	0.1	0.378503	247.541	25	9.05481	0.000199407	1208.58	0.00937964	1000.02	0.199403	0.000199403	120.858
Storage modulus	Loss modulus	Tan(delta)	Angular frequency	Oscillation torque	Step time	Temperature	Raw phase	Oscillation displacement	Complex viscosity	Axial force	Gap	Oscillation strain	Oscillation strain rate	Complex modulus
Pa	Pa		rad/s	µN.m	s	°C	°	rad	Pa.s	N	µm	%	1/s	Pa
445.501	70.9649	0.159292	100	49.7471	6.13081	25.01	179.743	0.000200059	4.51117	0.010578	1000.03	0.200052	0.200052	451.117
364.273	50.1089	0.137559	63.0957	18.8741	12.6672	25	179.531	0.000196482	5.82771	0.0101649	1000.03	0.196475	0.123967	367.704
326.198	41.3571	0.126785	39.8105	6.92039	19.2348	25	178.949	0.000195487	8.25936	0.00996002	1000.04	0.195478	0.0778208	328.81
302.369	35.6068	0.117759	25.1188	2.2661	25.7868	24.99	177.187	0.000198866	12.1207	0.00908687	1000.04	0.198857	0.0499504	304.458
286.882	33.7141	0.117519	15.849	0.398316	32.5417	25	164.549	0.000200397	18.2255	0.00881338	1000.05	0.200386	0.0317592	288.857
278.339	30.7571	0.110502	10.0001	0.376761	39.2653	25	14.9024	0.000200562	28.0032	0.010172	1000.04	0.200553	0.0200554	280.034
270.094	31.3874	0.116209	6.30957	0.653831	45.8953	25	8.69248	0.000200431	43.0951	0.00924578	1000.04	0.200422	0.0126458	271.912
261.495	31.3164	0.119759	3.98105	0.752558	52.6345	25	7.56828	0.000201496	66.1543	0.00884628	1000.01	0.201493	0.00802156	263.364
250.797	31.5962	0.125983	2.51189	0.775843	58.8121	25	7.48361	0.000203609	100.633	0.00849686	1000.05	0.203598	0.00511417	252.78
243.634	30.3599	0.124613	1.5849	0.768481	66.3781	25	7.22311	0.000202617	154.911	0.00896899	1000.02	0.202612	0.00321119	245.518
237.473	35.2616	0.148486	1	0.760267	76.1749	24.99	8.50334	0.000202968	240.077	0.00884946	1000.02	0.202963	0.00202963	240.077
232.76	31.3336	0.134617	0.630957	0.735609	89.747	25	7.68803	0.00019995	372.228	0.00808867	1000.03	0.199944	0.00126156	234.86
225.18	29.3546	0.130361	0.398107	0.720956	109.138	25	7.43565	0.000202351	570.412	0.00773055	1000.03	0.202344	0.000805545	227.085
221.716	32.9743	0.148723	0.251189	0.701596	137.733	25	8.46304	0.000199359	892.376	0.00847136	1000.04	0.19935	0.000500745	224.155
217.222	32.6395	0.150259	0.15849	0.687259	181.054	24.99	8.54681	0.000199224	1385.96	0.0074406	1000.03	0.199218	0.000315739	219.661
207.168	36.0053	0.173797	0.1	0.679006	247.588	25	9.8601	0.000205599	2102.74	0.00669839	1000.04	0.20559	0.00020559	210.274
Storage modulus	Loss modulus	Tan(delta)	Angular frequency	Oscillation torque	Step time	Temperature	Raw phase	Oscillation displacement	Complex viscosity	Axial force	Gap	Oscillation strain	Oscillation strain rate	Complex modulus
Pa	Pa		rad/s	µN.m	s	°C	°	rad	Pa.s	N	µm	%	1/s	Pa
-457.823	64.4108	-0.140689	100	52.6838	6.13081	25	179.779	0.000200432	4.62331	0.00712044	1000.02	0.20043	0.20043	462.332
-11.7125	51.2089	-4.37217	63.0957	22.3742	12.8232	25	179.548	0.000219428	0.832565	0.00641231	1000.02	0.219423	0.138447	52.5313
158.186	41.7247	0.263769	39.8105	8.27796	19.4064	25	179.013	0.000217615	4.10939	0.0063291	1000.02	0.21761	0.0866318	163.597
221.796	36.0434	0.162506	25.1188	2.49263	25.9116	25	177.437	0.000196896	8.94573	0.00542281	1000.04	0.196887	0.0494557	224.706
239.808	31.0383	0.12943	15.849	0.525343	32.6197	25	169.595	0.000194609	15.257	0.00607253	1000.02	0.194605	0.0308429	241.808
243.535	29.2735	0.120202	10.0001	0.266634	39.4369	25	19.9213	0.00019758	24.5287	0.00615186	1000.02	0.197575	0.0197577	245.288
240.822	29.2888	0.12162	6.30957	0.560441	46.0357	25	9.44672	0.000199937	38.4489	0.0059966	999.986	0.199939	0.0126153	242.596
234.94	26.7137	0.113705	3.98105	0.663538	52.7749	25	7.27889	0.000200356	59.3947	0.00669368	1000.03	0.200349	0.00797599	236.453
228.723	25.3601	0.110877	2.51189	0.694995	58.9681	24.99	6.62176	0.000201194	91.6141	0.00567186	1000.04	0.201185	0.00505356	230.125
221.264	23.0268	0.104069	1.5849	0.694712	66.6277	25	6.05235	0.000202519	140.362	0.00655923	1000.04	0.20251	0.00320957	222.459
217.131	25.9694	0.119603	1	0.687866	76.5805	25	6.87132	0.000201752	218.678	0.00585615	1000.04	0.201743	0.00201743	218.679
210.53	25.0802	0.119129	0.630957	0.669266	89.9966	25	6.81431	0.000201572	336.027	0.00767954	1000.01	0.201569	0.00127182	212.019
207.421	25.8908	0.124822	0.398107	0.652516	109.497	25	7.12374	0.000198979	525.062	0.00770187	1000.03	0.198972	0.000792123	209.031
202.194	31.7525	0.15704	0.251189	0.646803	138.091	24.99	8.92926	0.000201291	814.815	0.00793388	1000.03	0.201284	0.000505602	204.672
200.656	28.0043	0.139563	0.15849	0.642293	181.444	25	7.94665	0.000201868	1278.32	0.00815167	1000.02	0.201864	0.000319933	202.601
202.273	30.4268	0.150424	0.1	0.64069	247.744	25	8.5552	0.000199429	2045.49	0.00708248	1000.05	0.199418	0.000199418	204.549
Storage modulus	Loss modulus	Tan(delta)	Angular frequency	Oscillation torque	Step time	Temperature	Raw phase	Oscillation displacement	Complex viscosity	Axial force	Gap	Oscillation strain	Oscillation strain rate	Complex modulus
Pa	Pa		rad/s	µN.m	s	°C	°	rad	Pa.s	N	µm	%	1/s	Pa
961.681	56.7637	0.0590255	100	48.2417	6.11521	25	179.788	0.000200544	9.63354	0.0146987	1000.04	0.200533	0.200533	963.355
541.711	45.3423	0.0837019	63.0957	17.1114	12.792	25	179.563	0.000183455	8.61556	0.0134403	1000.03	0.183448	0.115748	543.605
367.008	34.4877	0.0939699	39.8105	6.63155	19.2972	25	179.107	0.000190792	9.25949	0.0140176	1000.03	0.190785	0.0759526	368.625
290.913	26.8952	0.0924511	25.1188	2.35016	25.818	25	177.907	0.000203143	11.6309	0.0138234	1000.02	0.203138	0.0510259	292.153
254.97	25.5912	0.100369	15.849	0.502236	32.5105	24.99	170.557	0.00020498	16.1682	0.0127983	1000.03	0.204973	0.0324863	256.251
239.191	24.7815	0.103605	10.0001	0.255587	39.3121	25	17.966	0.000202537	24.047	0.0135261	1000.05	0.202526	0.0202527	240.471
229.664	23.3118	0.101504	6.30957	0.528078	45.9577	25	8.04805	0.000201906	36.5863	0.0134993	1000.01	0.201903	0.0127392	230.844
221.061	23.2547	0.105196	3.98105	0.623229	52.6969	25	6.79153	0.000201774	55.8346	0.0137611	1000.04	0.201765	0.00803237	222.28
216.464	25.7698	0.119049	2.51189	0.652646	58.8589	25.01	7.12375	0.000199954	86.7844	0.0137779	1000.03	0.199947	0.00502245	217.993
208.908	23.4336	0.112172	1.5849	0.654742	66.5029	25	6.52686	0.000202192	132.638	0.0134564	1000.02	0.202188	0.00320447	210.218
199.662	24.7723	0.124071	1	0.642136	76.4401	25	7.1301	0.000204839	201.193	0.0129197	1000.04	0.20483	0.0020483	201.193
201.321	24.7279	0.122828	0.630957	0.630113	89.9498	25	7.02483	0.000198402	321.47	0.0135584	1000.02	0.198398	0.00125181	202.834
194.666	23.3118	0.119753	0.398107	0.621408	109.169	25	6.83778	0.000202049	492.473	0.0125166	1000.03	0.202042	0.000804345	196.057
190.017	25.5183	0.134295	0.251189	0.599276	137.639	24.99	7.65282	0.000199105	763.262	0.0136972	1000.04	0.199097	0.000500108	191.723
180.122	20.4218	0.113377	0.15849	0.571306	180.992	25	6.46987	0.000200683	1143.77	0.014347	1000.01	0.200681	0.000318058	181.276
178.035	25.5708	0.143628	0.1	0.552237	247.323	25	8.1741	0.000195486	1798.62	0.0144428	1000.02	0.195482	0.000195482	179.862
Storage modulus	Loss modulus	Tan(delta)	Angular frequency	Oscillation torque	Step time	Temperature	Raw phase	Oscillation displacement	Complex viscosity	Axial force	Gap	Oscillation strain	Oscillation strain rate	Complex modulus
Pa	Pa		rad/s	µN.m	s	°C	°	rad	Pa.s	N	µm	%	1/s	Pa
930.016	62.475	0.0671762	100	48.3348	6.13081	25	179.767	0.000200517	9.32112	0.0118979	1000.03	0.200508	0.200508	932.112
546.382	47.1061	0.0862145	63.0957	17.1984	12.8388	25	179.545	0.000184533	8.6917	0.0116428	1000.03	0.184526	0.116428	548.409
381.4	32.0727	0.0840921	39.8105	6.6299	19.3752	25	179.164	0.000191996	9.61421	0.0115804	1000.03	0.191989	0.076432	382.747
317.472	33.5811	0.105777	25.1188	2.24389	25.9272	25	177.29	0.000201126	12.7093	0.0106861	1000.04	0.201117	0.0505181	319.243
284.173	30.1858	0.106223	15.849	0.411691	32.6197	25	166.39	0.000204325	18.0309	0.0109254	1000.04	0.204316	0.032382	285.772
269.589	28.7904	0.106794	10.0001	0.349345	39.4057	25	15.084	0.00020104	27.112	0.0107562	1000.06	0.201027	0.0201028	271.122
256.972	27.9872	0.108912	6.30957	0.617644	46.0357	25	8.2859	0.000202476	40.9681	0.010319	1000.02	0.202471	0.012775	258.491
250.173	28.7865	0.115066	3.98105	0.711845	52.7749	25	7.3108	0.000200335	63.2556	0.0107668	1000.03	0.200328	0.00797515	251.824
240.535	28.1574	0.117061	2.51189	0.739435	58.9369	25.01	6.97161	0.00020293	96.4125	0.010536	1000.04	0.202921	0.00509717	242.178
231.457	27.4909	0.118773	1.5849	0.73481	66.3937	25.01	6.89409	0.00020426	147.066	0.0107532	1000.02	0.204255	0.00323723	233.084
232.245	22.4098	0.096492	1	0.715473	76.3621	25.01	5.55015	0.000196579	233.323	0.0102664	999.986	0.196581	0.00196581	233.324
222.116	27.2181	0.12254	0.630957	0.710135	90.1214	24.99	7.00642	0.000202616	354.663	0.00959637	1000.04	0.202607	0.00127837	223.777
214.27	24.0582	0.11228	0.398107	0.685864	109.45	25	6.41396	0.000202755	541.604	0.00974764	1000.04	0.202746	0.000807147	215.616
204.044	27.4587	0.134573	0.251189	0.658154	138.169	25	7.66819	0.000203614	819.636	0.00911155	1000.01	0.203611	0.000511448	205.883
204.347	30.7672	0.150563	0.15849	0.638026	181.444	25	8.56398	0.000196597	1303.87	0.00969545	1000.02	0.196592	0.000311579	206.651
199.055	32.8939	0.16525	0.1	0.627449	248.103	25.01	9.38407	0.000198011	2017.54	0.00892844	1000.04	0.198002	0.000198002	201.754

## Sheet: Fig 4C
Fmoc 3FPheDAP/MSG 7 equiv
Storage modulus	Loss modulus	Tan(delta)	Angular frequency	Oscillation torque	Step time	Temperature	Raw phase	Oscillation displacement	Complex viscosity	Axial force	Gap	Oscillation strain	Oscillation strain rate	Complex modulus			G'		G"
Pa	Pa		rad/s	µN.m	s	°C	°	rad	Pa.s	N	µm	%	1/s	Pa			742.9		70.8551
884.81	69.743	0.0788227	100	48.4252	6.14641	25.01	179.74	0.000200472	8.87554	0.00151828	1000.01	0.200467	0.200467	887.554			632.476		47.8915
875.255	56.3826	0.0644185	63.0957	17.5545	12.7608	25.01	179.423	0.000199587	13.9006	0.00160925	1000.06	0.199572	0.125922	877.069			921.117		83.9363
864.011	46.8254	0.0541954	39.8105	5.36093	19.344	24.99	178.435	0.000199106	21.7349	0.00112772	1000.05	0.199094	0.0792602	865.279			751.206		59.8505
847.266	50.3865	0.0594695	25.1188	0.58328	25.8648	25	164.268	0.000199828	33.7899	0.000678159	1000.03	0.19982	0.0501923	848.763			799.898		72.7601
833.391	54.0708	0.0648805	15.849	1.34618	32.5885	25	7.25259	0.000200104	52.6936	0.00177861	1000.03	0.200095	0.0317131	835.143		Average	769.519		67.0587
820.576	57.6746	0.0702855	10.0001	2.07595	39.3433	25	5.00964	0.000200111	82.2595	0.00105168	1000.04	0.200101	0.0200102	822.6		Std dev	104.558		13.7032
803.012	69.5785	0.0866469	6.30957	2.34572	46.0357	25	5.38391	0.000201389	127.746	0.00140239	1000.02	0.201383	0.0127064	806.021
790.52	66.4625	0.0840744	3.98105	2.41349	52.7125	24.99	4.96693	0.000200172	199.271	-5.00686e-05	1000.05	0.200159	0.00796844	793.309
762.766	84.1171	0.110279	2.51189	2.40827	58.9213	25	6.37813	0.000202485	305.503	-0.000533712	1000.02	0.202479	0.00508605	767.39
744.39	81.125	0.108982	1.5849	2.35865	66.5653	25	6.25362	0.000201632	472.459	0.000529129	1000.03	0.201623	0.00319552	748.798
729.696	82.907	0.113619	1	2.30457	76.5337	25	6.49634	0.000200227	734.391	7.41627e-05	1000.04	0.200216	0.00200216	734.391
700.184	76.2256	0.108865	0.630957	2.25189	90.0122	25	6.21868	0.00020374	1116.27	-0.000105073	1000.04	0.203729	0.00128545	704.321
680.17	82.545	0.121359	0.398107	2.17583	109.497	25	6.92206	0.000202245	1721.05	0.000373281	999.996	0.202244	0.000805147	685.16
667.777	83.5019	0.125045	0.251189	2.12812	138.232	24.99	7.12854	0.000201349	2679.17	-0.00109505	1000.01	0.201345	0.000505756	672.978
638.985	59.5928	0.0932617	0.15849	2.07769	181.506	25.01	5.32837	0.000206123	4049.21	-0.00139816	1000.01	0.206118	0.000326676	641.758
638.966	72.9286	0.114135	0.1	2.01832	247.775	25	6.5114	0.000199809	6431.14	-0.00211381	1000.04	0.199799	0.000199799	643.114
Storage modulus	Loss modulus	Tan(delta)	Angular frequency	Oscillation torque	Step time	Temperature	Raw phase	Oscillation displacement	Complex viscosity	Axial force	Gap	Oscillation strain	Oscillation strain rate	Complex modulus
Pa	Pa		rad/s	µN.m	s	°C	°	rad	Pa.s	N	µm	%	1/s	Pa
1416.19	42.1342	0.0297519	100	46.7773	5.99041	25	179.837	0.000200582	14.1681	0.0115862	1000.02	0.200573	0.200573	1416.81
992.7	35.108	0.0353662	63.0957	16.5396	12.6984	25	179.633	0.000192084	15.7431	0.0117668	1000.02	0.192077	0.121192	993.321
815.326	33.5017	0.0410899	39.8105	5.64791	19.2504	25	178.911	0.000204012	20.4974	0.0118439	1000.02	0.204005	0.0812155	816.014
735.375	33.489	0.04554	25.1188	0.943462	25.8024	25	173.43	0.000205229	29.3062	0.0120139	1000.02	0.205222	0.0515494	736.137
700.585	34.282	0.0489334	15.849	0.936537	32.4637	25	6.69442	0.000202749	44.2565	0.011752	1000.02	0.202743	0.0321328	701.423
684.436	38.6491	0.0564685	10.0001	1.65014	39.2809	25	4.23602	0.000200779	68.5522	0.0114811	1000.02	0.200773	0.0200775	685.526
671.546	43.2686	0.0644313	6.30957	1.9145	45.8797	25	4.07858	0.000200355	106.653	0.0117718	1000.02	0.200349	0.0126412	672.938
654.013	49.274	0.075341	3.98105	1.9981	52.6189	25	4.48459	0.000201862	164.747	0.0110683	1000.02	0.201856	0.00803599	655.867
642.685	50.2705	0.0782195	2.51189	1.99635	58.7497	25	4.54476	0.000200336	256.638	0.0122232	1000.03	0.200328	0.00503202	644.648
639.136	50.5547	0.0790984	1.5849	1.97775	66.1909	25	4.55151	0.000197646	404.526	0.0122565	1000.03	0.197638	0.00313236	641.132
607.419	58.0039	0.0954925	1	1.95562	76.1281	25	5.46928	0.000204594	610.182	0.0110172	1000.07	0.204578	0.00204578	610.182
590.449	55.5438	0.0940704	0.630957	1.89309	89.6534	25	5.37983	0.000203444	939.93	0.0113993	1000.03	0.203436	0.0012836	593.056
584.512	44.1514	0.0755355	0.398107	1.85499	109.029	25	4.32152	0.00020156	1472.41	0.00981381	1000.04	0.20155	0.000802385	586.178
574.03	55.1464	0.096069	0.251189	1.82699	137.748	25	5.48843	0.000201729	2295.78	0.0106704	1000	0.201727	0.000506715	576.673
571.424	55.4049	0.0969594	0.15849	1.80049	181.023	25	5.53839	0.000199673	3622.34	0.0101445	1000.01	0.199669	0.000316455	574.104
566.581	54.5508	0.0962808	0.1	1.78969	247.572	25	5.49964	0.000200176	5692.01	0.00823194	1000.01	0.200173	0.000200173	569.201
Storage modulus	Loss modulus	Tan(delta)	Angular frequency	Oscillation torque	Step time	Temperature	Raw phase	Oscillation displacement	Complex viscosity	Axial force	Gap	Oscillation strain	Oscillation strain rate	Complex modulus
Pa	Pa		rad/s	µN.m	s	°C	°	rad	Pa.s	N	µm	%	1/s	Pa
412.828	70.1682	0.16997	100	49.8198	5.99041	25	179.746	0.000200104	4.18749	0.0126406	1000.03	0.200097	0.200097	418.749
801.146	61.0999	0.0762657	63.0957	19.5789	12.48	25	179.383	0.000219695	12.7342	0.012315	1000.05	0.219681	0.138609	803.472
956.352	53.529	0.0559721	39.8105	4.97627	19.0008	25	178.109	0.000195315	24.0602	0.0124255	1000.03	0.195307	0.0777525	957.849
1002.46	56.916	0.0567766	25.1188	0.189142	25.5528	25	112.601	0.000195327	39.9729	0.0127763	1000.04	0.195316	0.0490611	1004.07
1011.71	62.865	0.0621375	15.849	1.89099	32.2609	24.99	5.94991	0.000198517	63.9572	0.0129581	1000.04	0.198506	0.0314613	1013.66
1006.5	70.946	0.0704877	10.0001	2.65404	39.0781	25	4.80563	0.00019953	100.899	0.0125382	1000.04	0.199519	0.0199521	1009
994.04	78.927	0.0794002	6.30957	2.93448	45.7081	25	4.85452	0.000200317	158.041	0.0133378	1000.03	0.200307	0.0126385	997.169
972.806	87.0735	0.0895076	3.98105	3.0068	52.4317	25	5.25313	0.000201285	245.336	0.0128041	1000.03	0.201276	0.00801291	976.695
958.881	96.8473	0.101	2.51189	2.98334	58.5781	25.01	5.8292	0.000199186	383.679	0.0125765	1000.03	0.199177	0.00500311	963.76
916.511	86.5789	0.0944657	1.5849	2.93971	66.1753	25	5.42041	0.000204208	580.853	0.0115669	1000.06	0.204193	0.00323624	920.591
896.467	90.5277	0.100983	1	2.85742	75.9877	25	5.77666	0.000202265	901.026	0.0119614	1000.04	0.202254	0.00202254	901.026
863.098	82.1598	0.0951917	0.630957	2.78107	89.513	25.01	5.44168	0.000204373	1374.1	0.0113326	1000.05	0.20436	0.00128942	867
850.058	96.8186	0.113897	0.398107	2.69863	108.873	25	6.49965	0.000200868	2149.05	0.0105257	999.997	0.200866	0.000799661	855.554
848.939	106.749	0.125744	0.251189	2.68428	137.514	25	7.16772	0.000199752	3406.3	0.0103776	1000.02	0.199745	0.000501737	855.624
822.191	86.0655	0.104678	0.15849	2.66147	180.867	25	5.97607	0.000204978	5216.01	0.00923567	1000.04	0.204967	0.000324851	826.683
830.855	88.6982	0.106755	0.1	2.62275	247.214	25	6.09359	0.00019984	8355.76	0.00816248	1000.04	0.199829	0.00019983	835.576
Storage modulus	Loss modulus	Tan(delta)	Angular frequency	Oscillation torque	Step time	Temperature	Raw phase	Oscillation displacement	Complex viscosity	Axial force	Gap	Oscillation strain	Oscillation strain rate	Complex modulus
Pa	Pa		rad/s	µN.m	s	°C	°	rad	Pa.s	N	µm	%	1/s	Pa
-65.086	64.053	-0.984129	100	51.4469	6.13081	25	179.775	0.000200592	0.913179	0.00448561	1000.03	0.200586	0.200586	91.318
486.277	48.3851	0.099501	63.0957	21.2173	12.6984	25.01	179.537	0.000225567	7.74503	0.00476263	1000.02	0.225561	0.142319	488.679
706.305	43.5498	0.0616586	39.8105	6.19046	19.2348	25	178.667	0.000210562	17.7754	0.00409999	1000.03	0.210553	0.0838223	707.647
778.337	42.9759	0.055215	25.1188	0.76097	25.7712	25.01	170.161	0.000192634	31.0334	0.00386727	1000.03	0.192626	0.0483853	779.522
804.581	42.3916	0.0526877	15.849	1.22949	32.4949	24.99	6.10911	0.000196507	50.8358	0.00414312	1000.02	0.1965	0.0311434	805.697
809.937	48.2586	0.0595832	10.0001	2.02375	39.2497	24.99	4.26366	0.000198495	81.1368	0.00329877	1000.04	0.198485	0.0198486	811.373
800.676	52.6318	0.0657342	6.30957	2.32789	45.9421	24.99	4.09062	0.000200873	127.172	0.00412197	1000.04	0.200862	0.0126735	802.404
782.628	54.8517	0.0700865	3.98105	2.41934	52.6189	25	4.14512	0.000202979	197.071	0.00286661	1000.04	0.202968	0.00808027	784.548
775.669	59.9838	0.0773317	2.51189	2.41347	58.7809	25	4.48097	0.000200131	309.721	0.0044373	1000.02	0.200124	0.0050269	777.985
754.325	64.0217	0.0848729	1.5849	2.39394	66.4249	25	4.87746	0.00020241	477.657	0.00360882	1000.02	0.202403	0.00320788	757.036
741.947	59.8029	0.0806026	1	2.34777	76.4401	25	4.61825	0.000201243	744.353	0.00341125	1000.03	0.201235	0.00201235	744.353
713.414	80.0232	0.112169	0.630957	2.30337	90.2306	25	6.40577	0.000204455	1137.78	0.00295934	1000.04	0.204445	0.00128996	717.888
721.277	71.6833	0.0993839	0.398107	2.25695	109.606	25	5.67759	0.000198305	1820.69	0.00391499	1000.02	0.198299	0.00078944	724.83
703.506	65.7081	0.093401	0.251189	2.2481	138.31	25	5.33671	0.000202594	2812.9	0.00345638	1000.04	0.202584	0.000508867	706.568
693.407	68.0542	0.0981446	0.15849	2.20483	181.522	24.99	5.60559	0.000201481	4396.11	0.00422234	1000.04	0.20147	0.000319309	696.738
685.972	67.6703	0.0986488	0.1	2.17431	247.978	25.01	5.634	0.000200824	6893.02	0.00512581	1000.02	0.200818	0.000200818	689.302
Storage modulus	Loss modulus	Tan(delta)	Angular frequency	Oscillation torque	Step time	Temperature	Raw phase	Oscillation displacement	Complex viscosity	Axial force	Gap	Oscillation strain	Oscillation strain rate	Complex modulus
Pa	Pa		rad/s	µN.m	s	°C	°	rad	Pa.s	N	µm	%	1/s	Pa
549.378	68.3103	0.124341	100	49.4575	5.97481	25	179.751	0.000200375	5.53608	0.0177566	1000.05	0.200363	0.200363	553.609
771.57	52.3035	0.0677884	63.0957	18.9588	12.48	25	179.475	0.000211638	12.2566	0.0179916	1000.01	0.211633	0.133532	773.341
853.546	47.6903	0.0558732	39.8105	5.34415	19.0476	25	178.415	0.000197278	21.4737	0.0174275	1000.03	0.19727	0.0785341	854.877
876.069	46.9853	0.053632	25.1188	0.486007	25.5684	24.99	162.614	0.000196776	34.9272	0.017798	1000.02	0.196769	0.0494261	877.328
877.977	50.8211	0.0578843	15.849	1.47481	32.4169	25	6.17845	0.000198846	55.489	0.0174041	1000.04	0.198835	0.0315134	879.447
876.871	56.016	0.0638817	10.0001	2.23818	39.0781	25	4.48437	0.000198901	87.8653	0.0158901	1000.06	0.198886	0.0198887	878.659
868.915	59.5953	0.0685859	6.30957	2.52368	45.7705	25.01	4.23825	0.000199245	138.037	0.0167548	1000.01	0.19924	0.0125712	870.956
854.679	64.3481	0.0752893	3.98105	2.6133	52.4473	25	4.43894	0.000200121	215.294	0.0163741	1000.06	0.200107	0.00796634	857.098
808.066	86.9207	0.107566	2.51189	2.59545	58.5781	24.99	6.21776	0.000205896	323.552	0.0174678	1000.02	0.205889	0.00517172	812.727
788.69	83.3635	0.105699	1.5849	2.52512	66.1285	25	6.06479	0.000203745	500.401	0.0160993	1000.02	0.203739	0.00322905	793.083
778.222	90.4973	0.116287	1	2.47134	75.9097	25	6.64666	0.000201227	783.466	0.0157035	999.984	0.201228	0.00201228	783.466
755.336	83.2218	0.110179	0.630957	2.41758	89.4818	25	6.29268	0.000202707	1204.37	0.0159366	999.99	0.202707	0.00127899	759.907
746.273	83.1643	0.111439	0.398107	2.36734	108.779	25	6.36088	0.00020079	1886.16	0.0149903	1000.06	0.200776	0.000799302	750.893
738.083	79.9644	0.108341	0.251189	2.32814	137.436	25	6.18413	0.000199679	2955.56	0.0140443	1000.04	0.199669	0.000501545	742.402
717.437	81.3936	0.113451	0.15849	2.29662	180.758	25	6.47286	0.000202506	4555.75	0.0149931	999.999	0.202504	0.000320947	722.039
712.062	79.59	0.111774	0.1	2.25718	247.338	24.99	6.37777	0.000200567	7164.96	0.0158371	1000.03	0.200559	0.000200559	716.496

## Sheet: Fig 4D
Fmoc 3FPheDAP MSG 5 equiv		9 equiv
																	G'		G"
Storage modulus	Loss modulus	Tan(delta)	Angular frequency	Oscillation torque	Step time	Temperature	Raw phase	Oscillation displacement	Complex viscosity	Axial force	Gap	Oscillation strain	Oscillation strain rate	Complex modulus			2042.07		175.631
Pa	Pa		rad/s	µN.m	s	°C	°	rad	Pa.s	N	µm	%	1/s	Pa			1947.13		179.458
2729.61	90.6485	0.0332093	100	42.9732	6.11521	25.01	179.617	0.000201953	27.3111	-0.0167796	1000.03	0.201938	0.201938	2731.12	0		1917.31		181.004
2491.18	113.619	0.0456084	63.0957	12.6243	12.6672	25	178.368	0.000201424	39.5236	-0.0166626	1000.02	0.201412	0.127082	2493.77			2289.38		213.077
2369.68	117.604	0.0496287	39.8105	0.76457	19.2504	25	150.75	0.000202253	59.5971	-0.0161153	1000.03	0.202239	0.0805126	2372.59			1844.55		178.142
2303.6	129.614	0.0562658	25.1188	4.05737	25.818	25	5.79708	0.000201308	91.8533	-0.016702	1000.02	0.201296	0.0505631	2307.24		Average	2008.09		185.462
2260.34	144.208	0.0637993	15.849	5.85879	32.7133	25	4.45349	0.000200855	142.907	-0.0169521	1000.03	0.200842	0.0318315	2264.94		Std dev	172.47		15.5625
2216.79	167.226	0.0754364	10.0001	6.50785	39.4057	25	4.65427	0.000201056	222.307	-0.0175393	1000.05	0.201039	0.020104	2223.08
2165.7	189.848	0.0876615	6.30957	6.67958	46.0201	25	5.16334	0.000201598	344.556	-0.0166525	1000.03	0.201585	0.0127192	2174
2124.57	182.549	0.0859226	3.98105	6.64727	52.7437	24.99	4.97083	0.000200882	535.637	-0.0155317	1000.01	0.200873	0.00799684	2132.4
2049.32	191.51	0.0934504	2.51189	6.53472	58.9525	25	5.36537	0.000203142	819.401	-0.0161368	1000.03	0.203129	0.00510239	2058.25
1999.36	212.161	0.106115	1.5849	6.35867	66.5809	24.99	6.06938	0.000201756	1268.59	-0.0161383	1000.02	0.201745	0.00319745	2010.58
1922.62	197.894	0.10293	1	6.19367	76.5337	25.01	5.88151	0.000204178	1932.77	-0.0159681	999.963	0.204179	0.00204179	1932.77
1921.27	227.43	0.118375	0.630957	6.02624	90.293	25	6.75301	0.000198377	3066.27	-0.0158723	1000.04	0.198363	0.00125159	1934.68
1846.55	189.569	0.102661	0.398107	5.94336	109.637	25	5.86214	0.000203867	4662.71	-0.0164318	1000	0.203861	0.000811585	1856.26
1818.66	176.868	0.0972522	0.251189	5.76953	138.232	25.01	5.55482	0.000201037	7274.36	-0.0171062	1000.03	0.201025	0.000504952	1827.24
1798.57	169.135	0.0940382	0.15849	5.66512	181.491	25	5.37216	0.000199655	11398.3	-0.0173246	1000.02	0.199645	0.000316417	1806.51
1791.95	163.211	0.0910798	0.1	5.59179	247.962	25	5.20402	0.000197856	17993.7	-0.0202224	1000.05	0.19784	0.00019784	1799.37
Storage modulus	Loss modulus	Tan(delta)	Angular frequency	Oscillation torque	Step time	Temperature	Raw phase	Oscillation displacement	Complex viscosity	Axial force	Gap	Oscillation strain	Oscillation strain rate	Complex modulus
Pa	Pa		rad/s	µN.m	s	°C	°	rad	Pa.s	N	µm	%	1/s	Pa
1427.1	108.212	0.0758265	100	46.8617	6.13081	25	179.582	0.000200909	14.312	-0.00473889	1000.04	0.200897	0.200897	1431.2
1926.53	105.779	0.0549064	63.0957	14.5934	12.792	25	178.669	0.000203996	30.5794	-0.00411773	1000.01	0.203988	0.128708	1929.43
2093.43	118.304	0.0565122	39.8105	1.51585	19.344	24.99	166.327	0.000192837	52.6688	-0.00413019	1000.06	0.192818	0.076762	2096.77
2147.99	133.064	0.0619482	25.1188	3.49433	25.896	25	6.76908	0.000197069	85.6772	-0.00384823	1000.02	0.197058	0.0494986	2152.11
2153.17	148.127	0.0687948	15.849	5.4658	32.6665	25	4.85373	0.000198782	136.176	-0.00437584	1000.03	0.198769	0.0315029	2158.26
2125.89	165.256	0.0777348	10.0001	6.20154	39.3901	24.99	4.81166	0.00020042	213.229	-0.00512275	1000.06	0.200401	0.0200403	2132.3
2087.82	184.903	0.0885627	6.30957	6.41651	46.0825	25	5.22212	0.000201101	332.192	-0.0056426	1000.06	0.201082	0.0126874	2095.99
2027.87	215.984	0.106508	3.98105	6.40001	52.7125	25	6.15707	0.000202342	512.262	-0.00456612	1000.01	0.202334	0.008055	2039.34
1986.23	239.52	0.120591	2.51189	6.27416	58.8901	25	6.9113	0.00020069	796.458	-0.00567786	1000.05	0.200674	0.00504071	2000.62
1922.62	223.777	0.116392	1.5849	6.1412	66.4717	25	6.65271	0.000202424	1221.28	-0.00462218	1000.04	0.20241	0.00320798	1935.59
1852.15	195.308	0.105449	1	5.97014	76.3309	24.99	6.02461	0.000204269	1862.42	-0.00488628	1000.06	0.204251	0.00204251	1862.42
1830.81	225.149	0.122978	0.630957	5.7933	90.0434	25.01	7.01316	0.000200022	2923.49	-0.00461325	1000.02	0.200012	0.00126199	1844.6
1816.71	170.462	0.0938303	0.398107	5.68506	109.403	25	5.36098	0.000198379	4583.41	-0.00444306	999.987	0.198376	0.000789747	1824.69
1748.5	173.22	0.0990679	0.251189	5.60847	138.045	25	5.65788	0.000203228	6994.99	-0.00471856	1000.02	0.203218	0.000510461	1757.06
1728.92	163.465	0.0945475	0.15849	5.47322	181.319	25	5.40109	0.000200656	10957.4	-0.00397717	1000.03	0.200644	0.000318	1736.63
1737.72	155.868	0.0896971	0.1	5.43271	247.947	25	5.12545	0.000198249	17447	-0.00548957	1000.04	0.198235	0.000198235	1744.7
Storage modulus	Loss modulus	Tan(delta)	Angular frequency	Oscillation torque	Step time	Temperature	Raw phase	Oscillation displacement	Complex viscosity	Axial force	Gap	Oscillation strain	Oscillation strain rate	Complex modulus
Pa	Pa		rad/s	µN.m	s	°C	°	rad	Pa.s	N	µm	%	1/s	Pa
2125.46	118.239	0.0556298	100	44.6251	6.13081	25.01	179.521	0.00020076	21.2875	-0.00117473	1000.04	0.200745	0.200745	2128.75
2191.11	116.536	0.0531859	63.0957	13.3204	12.7452	25	178.443	0.000197671	34.7758	-0.00183785	999.986	0.197667	0.124719	2194.2
2186.49	129.176	0.0590792	39.8105	1.28912	19.3128	25	161.814	0.00019831	55.0182	-0.00180012	1000.04	0.198295	0.0789424	2190.3
2176.58	137.939	0.0633743	25.1188	3.62214	25.8492	25	6.842	0.000199174	86.8252	-0.00100819	1000.04	0.199159	0.0500265	2180.94
2147.34	155.452	0.0723929	15.849	5.48562	32.4325	25.01	5.10949	0.000200087	135.842	-0.00139746	1000	0.20008	0.0317107	2152.96
2105.38	181.543	0.0862282	10.0001	6.1576	39.0937	25	5.33877	0.000200926	211.318	-0.00188886	1000.01	0.200917	0.0200918	2113.2
2051.9	193.021	0.0940694	6.30957	6.33358	45.7705	24.99	5.54795	0.000201981	326.64	-0.00229293	1000.06	0.201962	0.012743	2060.96
1996.99	229.514	0.11493	3.98105	6.28707	52.4785	25	6.64106	0.000201698	504.926	-0.00192706	1000.03	0.201686	0.00802922	2010.13
1943.34	236.831	0.121868	2.51189	6.15572	58.6405	25	6.98457	0.000201234	779.381	-0.00246206	1000.03	0.201222	0.00505448	1957.72
1849.51	168.456	0.0910813	1.5849	5.99762	66.1753	25	5.21553	0.000206057	1171.79	-0.00253117	1000.03	0.206045	0.0032656	1857.17
1858.49	223.43	0.120221	1	5.78047	76.0657	25	6.86101	0.00019677	1871.87	-0.00224674	1000.01	0.196762	0.00196762	1871.87
1785.73	239.861	0.134321	0.630957	5.69735	89.6066	25.01	7.65276	0.000201382	2855.61	-0.0022498	999.997	0.201376	0.0012706	1801.77
1720.34	190.072	0.110485	0.398107	5.51254	109.013	25.01	6.30552	0.000202798	4347.6	-0.00336236	1000.01	0.20279	0.000807322	1730.81
1688.17	168.687	0.0999229	0.251189	5.37462	137.561	24.99	5.70641	0.000201704	6754.2	-0.00243562	1000.05	0.201688	0.000506617	1696.58
1648.14	131.83	0.0799876	0.15849	5.2941	180.867	25	4.5732	0.000203861	10432.2	-0.00380792	1000.04	0.203847	0.000323077	1653.4
1683.9	148.246	0.0880372	0.1	5.23705	247.37	25	5.0311	0.000197244	16904.1	-0.00480976	1000.03	0.197233	0.000197233	1690.41
Storage modulus	Loss modulus	Tan(delta)	Angular frequency	Oscillation torque	Step time	Temperature	Raw phase	Oscillation displacement	Complex viscosity	Axial force	Gap	Oscillation strain	Oscillation strain rate	Complex modulus
Pa	Pa		rad/s	µN.m	s	°C	°	rad	Pa.s	N	µm	%	1/s	Pa
3058.88	145.042	0.0474167	100	41.7215	6.13081	25	179.371	0.000200947	30.6232	0.0110056	1000.02	0.200933	0.200933	3062.32
2792.84	137.708	0.0493077	63.0957	11.7298	12.6984	25.01	177.861	0.00020241	44.3172	0.0124747	999.98	0.202405	0.127709	2796.23
2659.06	156.762	0.0589541	39.8105	0.557579	19.2036	25	63.1135	0.000201975	66.9088	0.0103657	999.992	0.201968	0.0804043	2663.68
2587.84	164.22	0.0634582	25.1188	4.95937	25.7712	24.99	6.0058	0.000201177	103.231	0.0101329	1000.02	0.201165	0.0505302	2593.05
2530.28	183.524	0.0725312	15.849	6.73443	32.4013	24.99	4.94412	0.000201349	160.069	0.00959485	1000	0.201341	0.0319106	2536.93
2489.7	207.031	0.083155	10.0001	7.35611	39.2185	25	5.0841	0.00020047	249.828	0.0111256	1000	0.200462	0.0200463	2498.3
2442.57	228.057	0.0933679	6.30957	7.52068	45.8485	25.01	5.4784	0.000200452	388.804	0.00992958	1000.03	0.200438	0.0126468	2453.19
2353.72	232.904	0.0989513	3.98105	7.47642	52.5721	25	5.71309	0.000203455	594.118	0.0095094	1000.02	0.203443	0.00809916	2365.22
2321.05	240.846	0.103766	2.51189	7.28741	58.7341	24.99	5.95006	0.000199698	928.986	0.00866505	1000.02	0.199686	0.00501591	2333.51
2232.57	247.031	0.110649	1.5849	7.14961	66.1285	25	6.32527	0.000203016	1417.25	0.00914105	1000.03	0.203002	0.00321738	2246.2
2169.17	238.373	0.109891	1	6.92345	76.1749	25	6.27561	0.000202142	2182.23	0.0099753	1000.04	0.202127	0.00202127	2182.23
2065.69	243.948	0.118095	0.630957	6.73962	89.8094	25	6.737	0.000206354	3296.65	0.00800816	1000.05	0.206337	0.0013019	2080.05
2066.23	222.709	0.107785	0.398107	6.52317	109.247	25	6.15243	0.000199861	5220.2	0.00958051	1000.02	0.19985	0.000795619	2078.2
2081	224.309	0.107789	0.251189	6.45372	137.935	24.99	6.15221	0.000196322	8332.58	0.00623131	1000.05	0.196305	0.000493096	2093.05
2022.65	199.464	0.0986148	0.15849	6.44154	181.116	24.99	5.63193	0.000201776	12824	0.00608757	1000	0.201769	0.000319783	2032.47
2029.79	193.903	0.0955289	0.1	6.37405	247.51	25	5.45671	0.000199023	20390.3	0.00504071	1000.03	0.19901	0.00019901	2039.03
Storage modulus	Loss modulus	Tan(delta)	Angular frequency	Oscillation torque	Step time	Temperature	Raw phase	Oscillation displacement	Complex viscosity	Axial force	Gap	Oscillation strain	Oscillation strain rate	Complex modulus
Pa	Pa		rad/s	µN.m	s	°C	°	rad	Pa.s	N	µm	%	1/s	Pa
1861.01	116.244	0.0624627	100	45.4938	6.14641	24.99	179.538	0.000200916	18.6464	0.00311378	999.989	0.200912	0.200912	1864.64
2027.63	114.754	0.0565952	63.0957	13.8332	12.714	25	178.524	0.000197745	32.1872	0.00321509	1000.05	0.197728	0.124758	2030.88
2069.55	123.14	0.0595005	39.8105	1.62323	19.266	25	166.429	0.000196941	52.0771	0.00430214	1000.03	0.196928	0.0783982	2073.21
2070.22	132.931	0.0642112	25.1188	3.28301	25.8024	25.01	7.26135	0.000198746	82.587	0.0029658	1000.03	0.198733	0.0499194	2074.49
2050.34	148.267	0.0723135	15.849	5.17995	32.5105	24.99	5.16103	0.000200085	129.705	0.00332451	1000	0.200079	0.0317105	2055.7
2020.85	169.401	0.0838267	10.0001	5.87648	39.2965	25.01	5.20906	0.000200511	202.793	0.00415429	999.981	0.200508	0.020051	2027.94
1977.78	185.903	0.0939959	6.30957	6.07509	45.9577	25	5.55038	0.000201232	314.839	0.00284451	1000.01	0.201224	0.0126964	1986.5
1932.08	215.698	0.11164	3.98105	6.05514	52.6657	25	6.45543	0.000200945	488.333	0.00399527	1000.02	0.200935	0.00799932	1944.08
1852.41	194.245	0.104861	2.51189	5.95139	58.8433	25	6.01914	0.000204549	741.499	0.00428475	1000.02	0.204538	0.00513779	1862.57
1839.83	208.752	0.113462	1.5849	5.75923	66.6433	25	6.48733	0.000198454	1168.3	0.00407754	1000.01	0.198446	0.00314516	1851.64
1759.29	202.419	0.115058	1	5.66486	76.4557	25	6.56929	0.00020384	1770.89	0.00393944	1000.01	0.203833	0.00203833	1770.89
1693.13	193.978	0.114568	0.630957	5.47069	90.215	25.01	6.53806	0.000204445	2700.99	0.00434775	1000	0.204439	0.00128992	1704.21
1673.69	193.262	0.115471	0.398107	5.31166	109.528	25	6.58764	0.000200747	4232.06	0.00379288	1000.03	0.200736	0.000799144	1684.81
1652.23	182.637	0.11054	0.251189	5.21081	138.216	25.01	6.30808	0.000199581	6617.72	0.00269959	1000.01	0.199574	0.000501307	1662.29
1629.61	167.729	0.102925	0.15849	5.13491	181.444	25	5.87649	0.000199559	10336.5	0.00214378	1000.02	0.199549	0.000316265	1638.22
1602.64	175.63	0.109588	0.1	5.09728	247.9	25	6.25387	0.000201289	16122.3	0.000133163	1000.03	0.201278	0.000201278	1612.23

## Sheet: Table 1
2008.09				1.2699e-08		12.69 nm		Calculation of Mesh size
769.519				1.74834e-08		17.48 nm
208.956				2.69989e-08		26.9 nm
21.3825				5.77226e-08		57.7 nm
7414.34				8.21626e-09		8.21 nm

## Sheet: Fig S9
Phe MSG
Storage modulus	Loss modulus	Tan(delta)	Angular frequency	Oscillation torque	Step time	Temperature	Raw phase	Oscillation displacement	Complex viscosity	Axial force	Gap	Oscillation strain	Oscillation strain rate	Complex modulus
Pa	Pa		rad/s	µN.m	s	°C	°	rad	Pa.s	N	µm	%	1/s	Pa
-580.353	84.7884	-0.146098	100	53.0064	6.00601	25.01	179.712	0.000200184	5.86514	-0.0105826	1000.03	0.200179	0.20018	586.514
-171.383	67.7748	-0.395459	63.0957	22.7312	12.48	25	179.416	0.000217562	2.92091	-0.0107078	1000.02	0.217559	0.13727	184.297
-15.4952	54.1802	-3.49657	39.8105	8.77853	19.0788	25	178.804	0.000215304	1.41552	-0.0110124	1000.03	0.215298	0.085711	56.3524
36.9388	41.5393	1.12455	25.1188	3.11724	25.662	25	177.597	0.000200272	2.21299	-0.0106396	1000.03	0.200266	0.0503044	55.5877
52.4458	34.6184	0.660079	15.849	1.1004	32.2921	25	174.452	0.000195636	3.96498	-0.0111548	999.985	0.195639	0.0310069	62.841
52.7991	28.5752	0.541206	10.0001	0.353924	39.1093	25.01	165.435	0.000198303	6.00353	-0.0120771	1000.05	0.198293	0.0198294	60.0357
50.6412	23.7752	0.469483	6.30957	0.0871334	45.7237	25	120.774	0.000200467	8.8666	-0.0118912	1000.03	0.200461	0.0126482	55.9445
47.9472	20.0568	0.41831	3.98105	0.0937783	52.4473	25	42.1597	0.000199792	13.0551	-0.0113688	1000.01	0.19979	0.00795372	51.9732
43.7257	16.6701	0.381242	2.51189	0.119661	58.6249	25	26.4856	0.000203798	18.6296	-0.0114668	999.992	0.2038	0.00511923	46.7956
40.4828	15.3262	0.378586	1.5849	0.125015	66.2689	25	22.8368	0.000201543	27.3121	-0.0118502	1000.02	0.201539	0.00319418	43.2868
37.8222	14.0208	0.370702	1	0.122774	76.2217	25	21.175	0.000201367	40.3373	-0.0111299	1000.01	0.201365	0.00201365	40.3373
34.0668	13.6271	0.40001	0.630957	0.112804	89.7158	24.99	22.184	0.000198988	58.1516	-0.0124356	1000.03	0.198982	0.00125549	36.6912
31.4879	13.5772	0.431189	0.398107	0.107485	109.153	24.99	23.497	0.00020095	86.1334	-0.0124197	1000.05	0.200939	0.000799954	34.2903
29.3867	12.7215	0.432899	0.251189	0.0999774	137.717	25	23.481	0.000199352	127.482	-0.012488	1000.02	0.199348	0.000500739	32.0221
27.0801	11.0675	0.408695	0.15849	0.0928702	181.148	25	22.2599	0.00020237	184.582	-0.0123606	1000.04	0.202361	0.000320722	29.2544
25.7245	10.225	0.397481	0.1	0.086541	247.775	25.01	21.6893	0.000199131	276.821	-0.0115814	999.999	0.199131	0.000199131	27.6821
Storage modulus	Loss modulus	Tan(delta)	Angular frequency	Oscillation torque	Step time	Temperature	Raw phase	Oscillation displacement	Complex viscosity	Axial force	Gap	Oscillation strain	Oscillation strain rate	Complex modulus
Pa	Pa		rad/s	µN.m	s	°C	°	rad	Pa.s	N	µm	%	1/s	Pa
664.95	83.8558	0.126108	100	49.104	6.13081	25	179.692	0.000200238	6.70216	0.0118569	1000	0.200236	0.200236	670.216
323.027	65.3298	0.202243	63.0957	17.8444	12.6672	25	179.392	0.000184504	5.22328	0.011089	1000.01	0.184502	0.116413	329.567
182.485	51.2612	0.280907	39.8105	6.97958	19.266	25	178.775	0.000185318	4.76125	0.0109191	1000.01	0.185316	0.0737752	189.548
115.308	42.3597	0.367361	25.1188	2.8312	25.7868	25	177.34	0.000197492	4.89046	0.0105014	1000.01	0.19749	0.049607	122.842
82.0627	35.311	0.430293	15.849	1.04724	32.5885	25	173.833	0.000202834	5.63677	0.0110211	1000	0.202834	0.0321471	89.3373
65.323	29.3676	0.449575	10.0001	0.323518	39.2965	25	163.228	0.00020237	7.16204	0.0113705	1000	0.20237	0.0202372	71.6208
56.705	24.3755	0.429865	6.30957	0.0814479	45.9421	24.99	108.37	0.000201885	9.7823	0.01083	1000.03	0.201879	0.0127377	61.7221
50.277	20.9851	0.417389	3.98105	0.102438	52.6501	25	40.6042	0.00020226	13.685	0.0113398	1000.03	0.202254	0.00805184	54.4808
47.4014	17.1319	0.361421	2.51189	0.129076	58.7809	25	24.7679	0.000200949	20.0655	0.0122648	1000.02	0.200945	0.00504751	50.4023
43.6291	15.3558	0.351962	1.5849	0.134064	66.3781	25	21.2239	0.000201213	29.1833	0.0118526	1000.02	0.201209	0.00318895	46.2525
41.2305	15.6999	0.380784	1	0.133821	76.1749	25	21.625	0.000199984	44.1185	0.0120249	1000.03	0.199978	0.00199978	44.1185
36.7468	12.4188	0.337957	0.630957	0.121056	89.9186	25.01	18.9844	0.000201882	61.4758	0.0109046	1000.03	0.201876	0.00127375	38.7886
31.0559	13.9465	0.449078	0.398107	0.109201	109.309	25	24.3629	0.000205633	85.5139	0.0105205	1000.03	0.205627	0.000818616	34.0437
30.9717	15.9429	0.514758	0.251189	0.108707	137.967	25	27.315	0.000199202	138.678	0.0105893	1000.05	0.199192	0.000500346	34.8342
31.2626	15.6548	0.500753	0.15849	0.109908	181.21	25	26.6296	0.000200339	220.602	0.0104593	1000.03	0.200333	0.000317507	34.9632
30.8199	14.9379	0.484686	0.1	0.108119	247.557	25	25.8707	0.000201064	342.492	0.0115271	1000.04	0.201056	0.000201056	34.2492
Pa	Pa		rad/s	µN.m	s	°C	°	rad	Pa.s	N	µm	%	1/s	Pa
-542.7	95.3463	-0.175689	100	52.9626	5.97481	25	179.675	0.000200465	5.51012	-0.0163708	1000.03	0.200461	0.200461	551.012
-153.702	74.0457	-0.481748	63.0957	22.5762	12.5268	25	179.36	0.000216652	2.70396	-0.0158497	1000.03	0.216647	0.136695	170.608
-4.08948	59.1056	-14.4531	39.8105	8.709	19.0788	25.01	178.69	0.000214532	1.48822	-0.0158562	999.998	0.214533	0.0854065	59.2469
43.9903	46.8341	1.06465	25.1188	3.08897	25.662	25	177.272	0.000199828	2.55801	-0.0155665	1000.05	0.199818	0.0501919	64.254
55.9194	39.0128	0.697661	15.849	1.08893	32.3389	25	173.692	0.000195233	4.30206	-0.0149659	1000.01	0.195231	0.0309422	68.1834
57.6435	31.6989	0.549912	10.0001	0.34165	39.1717	25	163.22	0.000198092	6.5784	-0.0143276	999.998	0.198092	0.0198093	65.7845
54.9783	26.4653	0.481378	6.30957	0.0882307	45.8017	25	110.36	0.000198985	9.67048	-0.0140882	1000.03	0.198978	0.0125547	61.0166
51.786	22.7051	0.43844	3.98105	0.106987	52.5565	25	41.1417	0.000197368	14.2035	-0.0143679	1000.03	0.197362	0.00785708	56.5448
49.8107	18.9927	0.381298	2.51189	0.136439	58.6873	24.99	25.6565	0.000198017	21.2226	-0.0139643	1000.02	0.198013	0.00497388	53.3088
44.6155	17.0745	0.382703	1.5849	0.141171	66.2845	25	22.8463	0.000204369	30.1415	-0.0133132	1000.03	0.204363	0.00323893	47.7711
41.6894	15.4371	0.370289	1	0.134991	76.0813	25.01	21.0733	0.000200176	44.4557	-0.0134606	1000.04	0.200167	0.00200167	44.4557
38.791	14.1591	0.365009	0.630957	0.129502	89.591	25	20.3654	0.000202643	65.4471	-0.0128899	1000.05	0.202633	0.00127852	41.2943
35.8762	12.8119	0.357114	0.398107	0.120054	108.951	25	19.7837	0.000201919	95.6909	-0.0128026	1000.03	0.201913	0.000803829	38.0952
31.8994	13.0435	0.408896	0.251189	0.1087	137.655	25.01	22.3043	0.000201359	137.2	-0.0125635	1000.04	0.201351	0.000505771	34.4631
30.2172	13.4832	0.44621	0.15849	0.101941	180.836	25	24.0758	0.000196357	208.777	-0.0126014	1000.02	0.196353	0.000311199	33.0889
28.005	14.1557	0.505472	0.1	0.0991579	247.354	25.01	26.8287	0.000201268	313.793	-0.0135315	1000.02	0.201263	0.000201263	31.3793
Storage modulus	Loss modulus	Tan(delta)	Angular frequency	Oscillation torque	Step time	Temperature	Raw phase	Oscillation displacement	Complex viscosity	Axial force	Gap	Oscillation strain	Oscillation strain rate	Complex modulus
Pa	Pa		rad/s	µN.m	s	°C	°	rad	Pa.s	N	µm	%	1/s	Pa
511.402	102.424	0.200281	100	49.5879	6.00601	25	179.628	0.00020024	5.21558	7.96867e-05	1000.02	0.200235	0.200235	521.558
266.808	71.2004	0.26686	63.0957	18.4517	12.6828	25	179.343	0.000189055	4.37661	-0.00020521	1000.03	0.189049	0.119282	276.145
155.291	58.1787	0.374644	39.8105	7.16191	19.2816	25.01	178.625	0.000188015	4.16551	-0.000603644	1000.03	0.188009	0.0748473	165.831
99.0943	46.689	0.471158	25.1188	2.87594	25.7712	24.99	177.12	0.00019707	4.36097	-0.000120117	1000.04	0.197062	0.0494995	109.542
77.1224	34.6332	0.449068	15.849	1.05675	32.4013	25.01	174.04	0.000201703	5.3342	0.000183702	1000.04	0.201695	0.0319667	84.5418
60.4568	30.1392	0.498525	10.0001	0.338663	39.2029	25	163.586	0.000202141	6.75525	0.000358942	1000.03	0.202135	0.0202136	67.5529
51.4779	24.7485	0.48076	6.30957	0.0889642	45.8797	25	118.293	0.000201515	9.05258	-0.000177238	1000.03	0.201509	0.0127143	57.1179
45.9263	20.5399	0.447236	3.98105	0.0911103	52.5721	25	45.5787	0.000201695	12.6374	0.000823194	1000.04	0.201687	0.00802925	50.3101
41.5442	16.7533	0.403264	2.51189	0.112094	58.7185	25.01	28.1775	0.000201141	17.8332	-0.000130107	1000.02	0.201137	0.00505235	44.795
38.9614	14.9116	0.382727	1.5849	0.119436	66.3001	25	23.1515	0.000200485	26.3219	2.46817e-06	1000.04	0.200477	0.00317736	41.7175
36.9755	14.2512	0.385421	1	0.119167	76.1437	24.99	21.9577	0.000199061	39.6268	-0.00092004	1000.04	0.199053	0.00199053	39.6268
34.0026	12.3864	0.364277	0.630957	0.112639	89.8874	25	20.3727	0.000201542	57.3547	-0.00127405	1000.01	0.20154	0.00127163	36.1884
31.6034	12.0022	0.379776	0.398107	0.104762	109.247	25	20.9519	0.000198714	84.9161	-0.000479413	1000.06	0.198702	0.000791046	33.8057
29.2256	11.983	0.410017	0.251189	0.0988823	137.92	25	22.3653	0.000199902	125.75	-0.00119542	1000.04	0.199894	0.000502111	31.5869
28.3423	11.5128	0.406207	0.15849	0.0964819	181.179	25	22.1362	0.000201036	193.018	-0.00176275	1000.02	0.201032	0.000318615	30.5914
27.5071	10.9821	0.399248	0.1	0.0937925	247.666	25.01	21.7759	0.000201707	296.184	-0.000720588	1000.03	0.201701	0.000201701	29.6184
Storage modulus	Loss modulus	Tan(delta)	Angular frequency	Oscillation torque	Step time	Temperature	Raw phase	Oscillation displacement	Complex viscosity	Axial force	Gap	Oscillation strain	Oscillation strain rate	Complex modulus
Pa	Pa		rad/s	µN.m	s	°C	°	rad	Pa.s	N	µm	%	1/s	Pa
-805.849	102.409	-0.127082	100	53.8171	6.13081	24.99	179.657	0.000200562	8.1233	5.04212e-05	1000.07	0.20055	0.20055	812.33
-246.925	77.6534	-0.314482	63.0957	23.5942	12.7608	25.01	179.339	0.000223283	4.10245	0.00047001	1000.02	0.223279	0.14088	258.847
-33.4296	62.2633	-1.86252	39.8105	9.06936	19.3128	25	178.635	0.000220896	1.77516	-0.000188286	1000.03	0.220889	0.0879371	70.67
44.1162	52.6686	1.19386	25.1188	3.10772	25.8492	25	176.933	0.000201007	2.73516	0.000146797	1000.03	0.201001	0.050489	68.7039
67.0028	42.5479	0.635017	15.849	1.05112	32.5573	25	172.906	0.000194249	5.00792	0.000340607	1000.04	0.194241	0.0307853	79.3707
71.4616	34.5057	0.482856	10.0001	0.302244	39.3121	24.99	159.298	0.000197131	7.93556	3.65524e-05	1000	0.197131	0.0197132	79.3562
71.7424	28.6188	0.39891	6.30957	0.0921359	45.9577	24.99	76.3674	0.000199193	12.2417	0.000180529	1000.06	0.199181	0.0125675	77.24
67.2074	24.6081	0.366151	3.98105	0.151887	52.6501	24.99	30.7209	0.000200743	17.9779	-0.000365524	1000.04	0.200735	0.00799136	71.5709
63.9936	22.9877	0.359219	2.51189	0.182741	58.8121	25	23.1656	0.000199096	27.0701	-1.53966e-05	1000.04	0.199088	0.00500086	67.9971
59.227	19.7255	0.333048	1.5849	0.185712	66.2221	25	19.6844	0.000201898	39.3877	1.42213e-05	1000.04	0.20189	0.00319975	62.4254
55.8122	18.6097	0.333434	1	0.181849	76.1905	25	18.9551	0.000202077	58.833	0.000288071	1000.03	0.202071	0.00202071	58.833
51.8036	17.8339	0.34426	0.630957	0.172474	89.7002	24.99	19.2196	0.000202685	86.8322	0.00113889	1000.04	0.202677	0.0012788	54.7874
48.8335	17.5108	0.358582	0.398107	0.160552	109.013	24.99	19.8235	0.000197949	130.312	0.00194915	1000.01	0.197947	0.000788041	51.8781
44.1722	17.3435	0.392633	0.251189	0.150203	137.748	24.99	21.482	0.000201911	188.922	0.00262637	1000.02	0.201907	0.000507168	47.4551
41.6784	16.1366	0.387171	0.15849	0.140676	181.085	25	21.1839	0.000200555	281.994	0.00313352	1000.01	0.200553	0.000317856	44.6932
38.641	14.8882	0.385294	0.1	0.130113	247.463	25	21.0795	0.00020011	414.1	0.00199346	1000.03	0.200104	0.000200104	41.41

## Sheet: Fig S7A
Amplitude sweep - 1	MSG
Storage modulus	Loss modulus	Tan(delta)	Angular frequency	Oscillation torque	Step time	Temperature	Raw phase	Oscillation displacement	Axial force	Oscillation strain	Gap
Pa	Pa		rad/s	µN.m	s	°C	°	rad	N	%	µm
626.45	-33.4421	-0.0533836	10.0001	0.00359114	6.28681	25.01	-3.8545	3.67659e-07	-0.0228018	0.000459559	800.014
519.693	93.0488	0.179046	10.0001	0.0108097	12.9168	25	13.4325	1.37447e-06	-0.0226818	0.00171805	800.008
456.323	50.6907	0.111085	10.0001	0.0134319	19.6872	25	8.83238	2.07224e-06	-0.0224668	0.00259016	800.036
560.755	54.3641	0.096948	10.0001	0.0253879	26.286	25	7.19463	2.9788e-06	-0.023036	0.00372343	800.006
524.491	49.4111	0.0942076	10.0001	0.0406432	33.0565	25	7.14106	5.20807e-06	-0.0224724	0.00650973	800.035
517.527	41.8333	0.0808332	10.0001	0.0613003	39.8269	25	6.16279	8.01236e-06	-0.023367	0.0100148	800.045
536.862	40.8025	0.0760019	10.0001	0.100331	46.6441	25	5.7282	1.25002e-05	-0.0225566	0.0156244	800.034
534.007	34.6486	0.0648841	10.0001	0.160867	53.5081	25	4.90304	2.02115e-05	-0.0227516	0.0252627	800.044
536.231	31.6661	0.059053	10.0001	0.254282	60.2785	25	4.45832	3.17928e-05	-0.0237107	0.039739	800.032
538.325	31.0755	0.0577263	10.0001	0.404509	67.0957	25.01	4.35316	5.03237e-05	-0.0221433	0.0629011	800.036
541.335	33.6826	0.0622214	10.0001	0.645809	73.8817	25	4.6824	7.9718e-05	-0.023045	0.0996427	800.029
542.683	39.222	0.0722741	10.0001	1.02853	80.6521	25.01	5.43045	0.0001264	-0.023821	0.157992	800.033
543.889	34.7417	0.0638765	10.0001	1.64024	87.4694	24.99	4.79924	0.000201178	-0.0228027	0.251468	800.007
548.192	34.3383	0.0626391	10.0001	2.60789	94.3022	25	4.69523	0.000316641	-0.023051	0.395771	800.051
548.707	33.7836	0.0615694	10.0001	4.16098	101.135	25	4.61397	0.000504607	-0.0219385	0.630751	800.002
550.985	34.7758	0.0631157	10.0001	6.62023	107.952	25	4.72331	0.000798388	-0.0227588	0.997958	800.013
554.234	34.764	0.0627243	10.0001	10.5704	114.691	25.01	4.68571	0.00126509	-0.0225986	1.5813	800.019
555.265	35.6138	0.0641384	10.0001	16.8148	121.555	24.99	4.78817	0.0020073	-0.0226941	2.50899	800.031
544.807	36.0052	0.066088	10.0001	26.2284	128.326	25.01	4.96201	0.00320919	-0.0225169	4.01128	800.031
517.326	38.1972	0.0738358	10.0001	39.3263	135.081	25.01	5.63361	0.00514771	-0.022187	6.43428	800.036
417.186	55.291	0.132533	10.0001	49.4791	141.929	25	10.9014	0.00861977	-0.0212513	10.7742	800.03
302.64	65.9133	0.217795	10.0001	51.0668	148.699	25	20.9073	0.014081	-0.0214712	17.6012	799.997
148.624	77.9277	0.524327	10.0001	37.7913	155.517	24.99	76.632	0.0240309	-0.0206952	30.0367	800.05
69.0686	62.4123	0.903626	10.0001	62.0717	162.318	25	134.361	0.0362155	-0.0186079	45.2671	800.038
30.6179	42.1953	1.37813	10.0001	116.597	168.901	25	157.016	0.0549541	-0.0185738	68.6905	800.024
13.4999	25.4882	1.88803	10.0001	197.52	175.734	24.99	167.67	0.0842863	-0.0174219	105.353	800.034

## Sheet: Fig S7B
Amplitude sweep - 1		NaCl
Storage modulus	Loss modulus	Tan(delta)	Angular frequency	Oscillation torque	Step time	Temperature	Raw phase	Oscillation displacement	Axial force	Oscillation strain	Gap
Pa	Pa		rad/s	µN.m	s	°C	°	rad	N	%	µm
9750.35	1776.38	0.182186	10.0001	0.159529	6.33361	25	10.4598	8.30654e-07	0.209447	0.00103814	799.983
9967.82	3561.41	0.35729	10.0001	0.259591	12.9636	25	19.8969	1.26394e-06	0.210084	0.00157955	800.026
9952.98	2167.66	0.21779	10.0001	0.395463	19.7652	25	12.4417	2.0027e-06	0.210819	0.00250278	800.029
10067.6	1959.09	0.194595	10.0001	0.62874	26.598	25.01	11.1501	3.16222e-06	0.210853	0.00395182	800.03
10107.3	2144.23	0.212146	10.0001	1.00881	33.3841	25	12.1266	5.03588e-06	0.208967	0.00629327	800.038
10111.7	2208.67	0.218426	10.0001	1.59613	40.1857	24.99	12.4744	7.95357e-06	0.208899	0.00993957	800.029
10125.7	2177.12	0.21501	10.0001	2.54152	46.9873	25.01	12.2851	1.2656e-05	0.208425	0.0158162	800.027
10110	2106.72	0.208379	10.0001	4.03204	53.8045	25	11.9174	2.01375e-05	0.208544	0.0251659	800.029
10055.7	2162.99	0.2151	10.0001	6.35108	60.6061	25	12.2912	3.18481e-05	0.210246	0.0398012	800.017
10098.6	2142.68	0.212176	10.0001	10.0827	67.4077	25	12.1284	5.03747e-05	0.20849	0.0629538	800.022
10165.6	2207.92	0.217196	10.0001	16.008	74.2093	25	12.4055	7.93616e-05	0.208616	0.0991782	800.027
10092.1	2246.89	0.222638	10.0001	25.4871	81.0109	24.99	12.7075	0.000127138	0.207631	0.158884	800.034
10082.5	2165.15	0.214743	10.0001	40.2586	87.8126	25	12.271	0.000201357	0.208577	0.251635	800.032
10097.6	2154.58	0.213375	10.0001	63.7185	94.427	25	12.1949	0.000318306	0.20959	0.397779	800.043
10107.6	2169.59	0.214649	10.0001	101	101.229	25	12.2654	0.000503894	0.207985	0.62972	800.023
10045.1	2150.96	0.214131	10.0001	159.844	107.812	25	12.2376	0.000802592	0.206721	1.003	800.032
9947.32	2155.65	0.216707	10.0001	251.259	114.613	25	12.3819	0.00127345	0.2066	1.59144	800.028
9781.97	2140.9	0.218861	10.0001	393.018	121.462	25	12.5039	0.00202509	0.208661	2.53077	800.029
9543.01	2142.87	0.224548	10.0001	610.439	128.263	25	12.8224	0.00322118	0.202707	4.02557	800.024
8964.43	2142.08	0.238954	10.0001	926.122	135.065	25.01	13.6271	0.00518981	0.206882	6.4859	800.022
5394.37	2284.9	0.423571	10.0001	1095.48	141.882	25	23.4601	0.00972344	0.193341	12.1526	800.027
1488.16	1601.96	1.07647	10.0001	757.596	148.684	24.99	49.7086	0.0183737	0.185815	22.9652	800.043
861.969	1257.69	1.45909	10.0001	674.565	155.501	25.01	59.8028	0.0236112	0.205079	29.5123	800.03
168.223	646.917	3.8456	10.0001	559.689	162.318	25.01	86.6267	0.0439875	0.168629	54.9828	800.021
46.494	482.708	10.3822	10.0001	564.574	169.135	25	99.8262	0.0586965	0.168926	73.3667	800.042
0.435796	306.121	702.44	10.0001	620.918	175.937	24.99	112.956	0.0951246	0.167222	118.902	800.025

## Sheet: Fig S8
Storage modulus	Loss modulus	Tan(delta)	Angular frequency	Oscillation torque	Step time	Temperature	Raw phase	Oscillation displacement	Axial force	Oscillation strain	Gap
Pa	Pa		rad/s	µN.m	s	°C	°	rad	N	%	µm
-167.974	-27.6519	0.164621	10.0001	0.00555391	6.31801	25	184.779	1.06533e-06	-0.0193693	0.0010653	1000.03
-5.27036	-60.1336	11.4098	10.0001	0.00332505	13.0728	25	199.69	1.18606e-06	-0.0191976	0.00118606	1000
-17.2356	-75.2835	4.36792	10.0001	0.00762061	19.89	25	202.696	2.48653e-06	-0.0199184	0.0024864	1000.05
-3.21616	14.8621	-4.62106	10.0001	0.00910696	26.4888	25	174.883	3.47902e-06	-0.0196827	0.00347895	1000.02
33	11.9559	0.3623	10.0001	0.0121147	33.3061	25	174.736	5.91823e-06	-0.0200277	0.00591805	1000.03
35.2232	22.2259	0.631002	10.0001	0.0201006	40.1077	25.01	170.115	9.8841e-06	-0.0197427	0.00988421	999.988
29.6091	18.1628	0.613417	10.0001	0.0338991	46.9093	25	172.233	1.60583e-05	-0.0196204	0.0160583	1000
37.8286	19.0711	0.504145	10.0001	0.0490881	53.7421	25	171.321	2.47263e-05	-0.0194664	0.0247261	1000.01
36.2086	20.9867	0.579604	10.0001	0.0801865	60.5125	25	170.585	3.97924e-05	-0.0194748	0.0397915	1000.02
37.2379	21.177	0.568695	10.0001	0.126027	67.0957	25	170.424	6.30239e-05	-0.0184504	0.0630226	1000.02
38.4843	21.7575	0.56536	10.0001	0.200766	73.9129	25	170.071	0.000101298	-0.0199535	0.101295	1000.03
37.0321	21.0644	0.568815	10.0001	0.316357	80.7457	24.99	170.49	0.000157976	-0.018789	0.157975	1000.01
37.9244	22.2391	0.586407	10.0001	0.499021	87.5786	25	169.9	0.000250526	-0.019702	0.25052	1000.02
38.1399	22.431	0.588124	10.0001	0.792306	94.3334	25	169.797	0.000398324	-0.020241	0.398311	1000.03
37.7441	22.7839	0.603642	10.0001	1.26055	101.166	24.99	169.672	0.000631478	-0.0189761	0.631477	1000
36.5369	22.9336	0.627682	10.0001	2.01824	107.999	25	169.703	0.00100147	-0.0196511	1.00144	1000.03
34.7913	23.4181	0.673102	10.0001	3.24472	114.785	25	169.631	0.00158772	-0.0191681	1.58762	1000.06
33.0362	23.35	0.7068	10.0001	5.21027	121.587	25	169.797	0.00251636	-0.0197207	2.51629	1000.03
31.3414	22.9635	0.73269	10.0001	8.36439	128.404	25.01	170.09	0.00399118	-0.0190953	3.99093	1000.06
28.8068	22.2725	0.773166	10.0001	13.5164	135.205	25	170.561	0.00633641	-0.0191843	6.33615	1000.04
25.8581	20.9926	0.811837	10.0001	21.8713	142.007	25.01	171.283	0.0100525	-0.0190425	10.052	1000.05
22.6744	19.0704	0.841056	10.0001	35.4252	148.809	25	172.248	0.0159511	-0.0178709	15.9504	1000.04
19.2254	16.618	0.864378	10.0001	57.444	155.657	25	173.396	0.0253079	-0.0168339	25.3071	1000.03
15.6963	13.8482	0.882263	10.0001	93.1246	162.49	25	174.621	0.040133	-0.0169069	40.1318	1000.03
12.3824	11.0486	0.892286	10.0001	150.613	169.276	25.01	175.798	0.0635874	-0.0172722	63.5861	1000.02
9.51695	8.51853	0.895091	10.0001	242.767	175.844	25	176.819	0.100693	-0.0167818	100.69	1000.03
